# Supplementary material for: Genome-Wide Association Study Reveals Genetic Basis of Trace Elements Accumulation in Maize Kernels
Source: MDPI journal article supplement (doi:10.3390/agriculture12020262), 2022-02-11
Supplement: s1 [file s1]

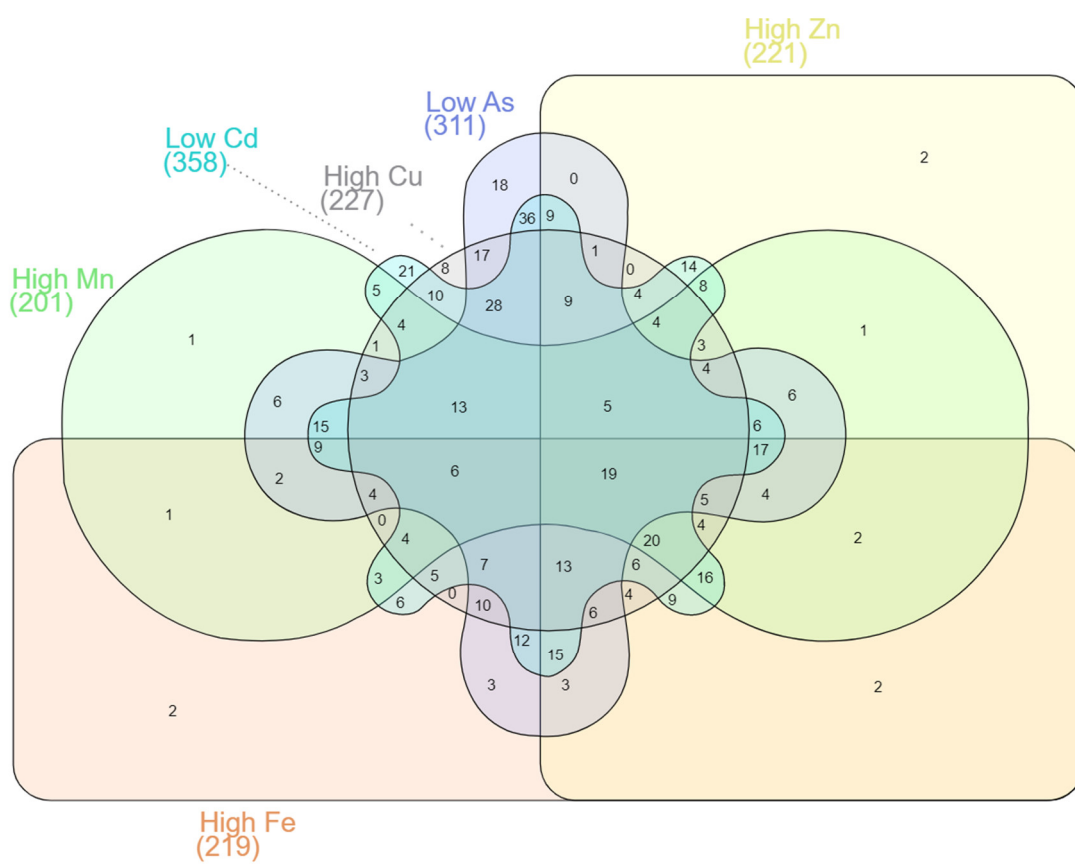

Supplemental Figure S1. Overlapped lines between lines with higher contents of Fe, Zn, Cu, Mn and lines with lower contents of As and Cd.
