# Supplementary material for: Genome-Wide Association Study Reveals Genetic Basis of Trace Elements Accumulation in Maize Kernels
Source: MDPI journal article supplement (doi:10.3390/agriculture12020262), 2022-02-11
Supplement: s1 [file s1]

**Supplemental Table S4.** Correlation of the contents of Fe, Zn, Cu, Mn, As and Cd in maize kernel compared to soil.

| Trait     | Source              | Df  | Sum Sq   | Mean Sq  | F value | Pr(>F)   |     |
|-----------|---------------------|-----|----------|----------|---------|----------|-----|
| <b>Fe</b> | Genotype            | 489 | 19054.00 | 38.97    | 2.49    | 6.20E-09 | *** |
|           | Location            | 2   | 577.00   | 288.47   | 18.43   | 1.06E-07 | *** |
|           | Genotype × Location | 781 | 10087.00 | 12.91    | 0.83    | 0.93     |     |
|           | Residuals           | 119 | 1862.00  | 15.65    |         |          |     |
| <b>Zn</b> | Genotype            | 489 | 70799.00 | 145.00   | 1.46    | 6.08E-03 | **  |
|           | Location            | 2   | 7356.00  | 3678.00  | 37.06   | 2.65E-13 | *** |
|           | Genotype × Location | 782 | 33616.00 | 43.00    | 0.43    | 1.00     |     |
|           | Residuals           | 122 | 12107.00 | 99.00    |         |          |     |
| <b>Cu</b> | Genotype            | 489 | 755.90   | 1.55     | 1.78    | 1.12E-04 | *** |
|           | Location            | 2   | 317.90   | 158.96   | 182.95  | < 2e-16  | *** |
|           | Genotype × Location | 777 | 692.50   | 0.89     | 1.03    | 0.44     |     |
|           | Residuals           | 117 | 101.70   | 0.87     |         |          |     |
| <b>Mn</b> | Genotype            | 489 | 7031.00  | 14.40    | 2.82    | 5.12E-11 | *** |
|           | Location            | 2   | 5296.00  | 2647.90  | 519.58  | < 2e-16  | *** |
|           | Genotype × Location | 786 | 5063.00  | 6.40     | 1.26    | 0.05     |     |
|           | Residuals           | 122 | 622.00   | 5.10     |         |          |     |
| <b>As</b> | Genotype            | 487 | 3.62     | 7.40E-03 | 30.82   | <2e-16   | *** |
|           | Location            | 2   | 2.74     | 1.37     | 5690.54 | <2e-16   | *** |
|           | Genotype × Location | 704 | 4.75     | 6.80E-03 | 28.03   | <2e-16   | *** |
|           | Residuals           | 122 | 0.03     | 2.00E-04 |         |          |     |
| <b>Cd</b> | Genotype            | 487 | 2.08E-01 | 4.27E-04 | 2.16    | 4.42E-07 | *** |
|           | Location            | 2   | 2.45E-03 | 1.23E-03 | 6.19    | 2.75E-03 | **  |
|           | Genotype × Location | 704 | 5.55E-02 | 7.89E-05 | 0.40    | 1.00     |     |
|           | Residuals           | 122 | 2.42E-02 | 1.98E-04 |         |          |     |
