# Supplementary material for: Genome-Wide Association Study Reveals Genetic Basis of Trace Elements Accumulation in Maize Kernels
Source: MDPI journal article supplement (doi:10.3390/agriculture12020262), 2022-02-11
Supplement: s1 [file s1]

Archive with 4 entries (4 files):
- Supplemental figure S1.pdf
- Supplemental table S1.xlsx
- Supplemental table S3.xlsx
- Supplemental table S4.pdf
