# Supplementary material for: Genome-Wide Association Study Reveals Genetic Basis of Trace Elements Accumulation in Maize Kernels
Source: MDPI journal article supplement (doi:10.3390/agriculture12020262), 2022-02-11
Supplement: s1 [file s1 › Supplemental table S1.xlsx]

## Sheet: Fe
Supplemental Table 1 The BLUP-based content (mg/kg) of Fe, Zn, Cu, Mn, As, Cd in Hainan, Dongyang and Xinxiang.
Lines	Fe	Zn	Cu	Mn	As	Cd
CIMBL36	30.41	42.03	2.27	7.46	0.051	*
CML134	30.01	31.9	2.24	7.07	0.052	0.007
Sy1128	29.7	38.05	2.26	7.22	0.054	0.006
By807	29.61	32.3	2.23	7.83	0.051	0.006
CIMBL108	29.47	42.19	2.23	10.16	0.067	*
By4960	29.11	42.2	2.31	7.74	0.051	0.007
CML113	29.01	45.18	2.22	10.27	0.062	0.005
CIMBL106	28.99	25.83	2.19	8.81	0.051	0.005
CIMBL66	28.6	33.13	2.28	7.91	0.051	0.005
CIMBL30	28.38	28.15	2.24	8.37	0.051	0.012
CIMBL95	28.33	31.77	2.27	8.01	0.053	0.005
CIMBL57	28.28	35.54	2.21	6.98	0.052	0.005
CIMBL69	28	33.45	*	8.36	0.052	0.007
CIMBL157	27.44	36.01	2.23	8.75	0.052	0.007
CIMBL86	27.31	41.65	2.24	8.83	0.052	0.008
CML130	27.29	32.47	2.24	6.43	0.052	0.042
CIMBL154	27.2	35.89	2.26	8.74	0.053	0.007
CIMBL98	27.09	33.9	2.32	10.67	0.053	0.008
CIMBL29	27	27.85	2.24	9.03	0.052	0.007
By804	26.95	30.89	2.22	7.06	0.052	0.006
Zheng653	26.91	27.93	2.18	6.83	0.051	0.005
303WX	26.83	27.94	2.28	8.35	0.052	0.007
CML114	26.79	41.92	2.28	9.55	0.051	0.007
Ry697	26.64	33.79	2.25	7.61	0.051	0.005
Gy462	26.59	31.44	2.26	8.21	0.051	0.004
D047	26.52	31.53	2.26	8.56	0.052	0.006
Zhi41	26.43	31.76	2.33	7.21	0.052	0.005
CML324	26.37	37.61	2.28	10.87	0.053	0.006
CIMBL21	26.33	32.67	2.24	6.96	0.052	0.005
CML415	26.32	39.15	2.28	9.01	0.053	0.007
CIMBL37	26.31	38.38	2.23	6.7	0.053	0.006
CIMBL153	26.21	37.06	2.26	9.35	0.054	0.008
04K5686	26.12	33.84	2.24	11.23	0.052	0.006
CML325	26.11	35.19	2.24	11.59	0.051	0.009
CIMBL89	26.11	35.06	2.27	7.44	0.053	0.006
CML115	26.09	38.73	2.24	9.21	0.052	0.007
CIMBL126	26.05	39.09	2.21	9.73	0.052	0.007
CIMBL52	26.01	40.51	2.21	9.22	0.052	0.006
MN	25.89	31.49	2.26	10.65	0.051	0.006
CML29	25.89	28.77	2.19	9.13	0.054	0.006
Dong46	25.88	36.27	2.24	8.67	0.052	0.008
CIMBL16	25.81	33.87	2.21	8.41	0.052	0.006
CML304	25.78	34.16	2.23	9.74	0.052	0.012
GEMS47	25.74	32.37	2.25	6.98	0.054	0.01
CML422	25.63	35.28	2.28	7.84	0.053	0.006
Tian77	25.52	29.5	2.23	7.2	0.051	0.006
CIMBL130	25.5	30.83	2.27	7.19	0.051	0.01
04K5702	25.48	30.65	2.26	9.19	0.052	0.006
By855	25.42	32.63	2.3	6.8	0.051	0.006
Zi330	25.4	33.03	2.22	6.89	0.051	0.006
GEMS65	25.33	35.88	2.27	8.14	0.052	0.005
CIMBL139	25.31	30.56	2.25	7.34	0.052	0.007
CIMBL155	25.3	44.26	2.24	9.67	0.051	0.009
CML411	25.28	35.83	2.26	7.29	0.054	0.007
Liao5262	25.26	28.98	2.22	7.25	0.051	0.005
CML480	25.19	27.75	2.17	8.45	0.051	0.005
CIMBL43	25.16	45.03	2.27	8.98	0.053	0.007
CIMBL58	25.15	33.5	2.22	10.4	0.054	0.006
CIMBL137	25.04	43.01	2.23	8.12	0.052	0.005
CML408	25.04	34.13	2.19	7.67	0.055	0.005
CML423	25.01	32.33	2.26	6.97	0.052	0.006
CIMBL1	25	37.63	2.22	7.88	0.052	0.005
GEMS64	24.99	34.75	2.22	7.39	0.052	0.005
CML31	24.97	32.91	2.28	8.77	0.053	0.012
Sy1039	24.96	32.92	2.23	7.11	0.051	0.007
CML298	24.95	35.35	2.24	7.54	0.054	0.005
Sy3073	24.89	33.02	2.27	8.46	0.051	0.014
CIMBL112	24.87	36.82	2.28	7.44	0.052	0.006
Sy1077	24.87	39.26	2.24	7.62	0.052	0.006
CML225	24.86	33.05	2.28	8.08	0.052	0.008
501	24.8	30.41	2.23	6.84	0.051	0.025
GEMS19	24.77	29	2.22	7.57	0.051	0.005
CIMBL90	24.75	37.14	2.26	7.04	0.054	0.025
CML170	24.75	30.93	2.28	8.43	0.052	0.006
Z2018F	24.74	27.52	2.29	7.64	0.051	0.005
CIMBL34	24.68	28.73	2.18	10.01	0.054	0.007
Sy999	24.63	32.7	2.26	7.76	0.051	0.012
GEMS15	24.63	31.69	2.24	9.46	0.051	0.006
CIMBL150	24.61	28.25	2.23	7.71	0.052	0.011
By815	24.61	30.41	2.21	6.9	0.052	0.007
Sy1052	24.59	38.49	2.22	7.71	0.051	0.006
CIMBL44	24.59	34.2	2.22	7.15	0.051	0.014
CIMBL54	24.59	33.07	2.28	7.11	0.052	0.006
CML169	24.58	38.14	2.28	7.51	0.053	0.02
CML323	24.58	31.42	2.2	7.4	0.052	0.005
CIMBL135	24.57	41.09	2.29	9.54	0.052	0.008
By843	24.54	38.45	2.2	7.69	0.052	0.006
CIMBL72	24.54	32.97	2.23	8.76	0.052	0.007
CML50	24.53	28.99	2.26	6.47	0.053	0.007
SW1611	24.51	27.46	2.24	7.74	0.051	0.006
ZaC546	24.5	31.65	2.32	9.12	0.051	0.023
Zhong69	24.5	30.68	2.26	8.1	0.054	0.033
9642	24.46	30.07	2.25	8.05	0.051	0.015
By809	24.46	30.53	2.22	7.28	0.051	0.005
CIMBL133	24.45	29.06	2.26	9.28	0.066	0.007
CY72	24.43	24.05	2.23	7.38	0.051	0.014
CML226	24.43	38.52	2.2	8.29	0.052	0.006
CIMBL63	24.41	31.95	2.33	9.5	0.053	0.01
CIMBL136	24.41	33.65	2.24	8.91	0.053	0.005
CIMBL47	24.4	34	2.2	8.52	0.055	0.006
CIMBL107	24.34	30.44	2.22	7.16	0.055	0.007
CIMBL85	24.31	39.19	2.28	7.62	0.053	0.008
CIMBL11	24.29	41.03	2.24	8.49	0.052	0.006
CIMBL79	24.28	33.77	2.21	9.54	0.053	0.007
By4944	24.26	32.53	2.25	7.13	0.054	0.006
150	24.25	28.44	2.25	7	0.051	0.024
Chang7-2	24.25	30.75	2.29	7.31	0.051	0.005
TX5	24.24	34.66	2.27	8.9	0.052	0.005
Gy220	24.23	32.26	2.25	7.92	0.052	0.008
Jiao51	24.23	30.45	2.25	8.88	0.051	0.006
Yan414	24.21	29.55	2.22	7.42	0.052	0.006
CIMBL109	24.2	29.4	2.22	7.55	0.054	0.005
By4839	24.19	32.99	2.29	9.14	0.052	0.014
CML165	24.17	38.04	2.19	7.72	0.052	0.029
CIMBL56	24.17	31.73	0	7.36	0.055	0.006
CIMBL113	24.16	34.9	2.24	7.69	0.07	0.006
Mo17	24.12	29.82	2.26	7.44	0.052	0.012
Dong237	24.1	31.14	2.2	8.26	0.053	0.016
CML139	24.05	32.46	2.2	8.21	0.052	0.006
LK11	24.04	28.35	2.2	7.77	0.053	0.014
CIMBL116	24.03	35.89	2.25	7.92	0.053	0.006
CML228	24.03	31.09	2.3	7.53	0.052	0.007
NMJT	24.01	28.03	2.27	8.79	0.051	0.006
CIMBL67	23.99	26.1	2.18	8.87	0.052	0.006
CML191	23.97	30.24	2.27	9.03	0.051	0.007
CIMBL83	23.97	30.4	2.23	7.83	0.055	0
TY10	23.97	30.61	2.24	7.73	0.051	0.008
CIMBL148	23.96	31.53	2.22	7.41	0.052	0.006
CIMBL94	23.95	35.88	2.22	7.46	0.056	0.016
CML69	23.95	34.33	2.26	8.4	0.053	0.006
CML287	23.95	34.43	2.18	8.97	0.053	0.005
D863F	23.93	31.87	2.29	8.26	0.051	0.025
CIMBL119	23.9	35.3	2.22	8.61	0.053	0.006
GEMS61	23.88	31.05	2.26	8.39	0.052	0.005
CML326	23.88	33.71	2.25	9.2	0.054	0.006
HTH-17	23.82	31.16	2.23	7.2	0.052	0.008
CIMBL140	23.82	30.01	2.21	8.72	0.052	0.006
5237	23.77	26.4	2.21	6.6	0.052	0.019
CML40	23.77	25.39	2.24	7.3	0.052	0.005
GEMS17	23.77	29.47	2.2	6.72	0.051	0.006
TY9	23.76	34.12	2.26	8.14	0.052	0.008
CML121	23.72	27.33	2.2	6.85	0.053	0.006
CIMBL111	23.72	34.41	2.22	9.13	0.056	0.008
IRF291	23.69	30.64	2.23	8.08	0.051	0.007
A619	23.68	34.5	2.29	7.47	0.051	0.008
4F1	23.68	31.26	2.21	7.93	0.051	0.012
CIMBL91	23.68	37.41	2.21	11.22	0.052	0.005
GEMS53	23.66	32.73	2.22	7.39	0.051	0.005
C8605	23.63	26.96	2.27	8.02	0.052	0.014
CIMBL146	23.61	33.93	2.29	8.49	0.052	0.006
GEMS62	23.61	34.28	2.2	8.32	0.051	0.005
CIMBL147	23.59	31.29	2.23	7.61	0.057	0.023
5311	23.58	31.6	2.25	9.21	0.054	0.006
CN962	23.58	33.62	2.24	8.01	0.051	0.005
CIMBL121	23.58	30.09	2.23	7.67	0.052	0.008
XZ698	23.57	28.68	2.29	7.71	0.051	0.015
CML122	23.53	32.75	2.18	7.8	0.052	0.008
CIMBL39	23.53	27.74	2.25	6.95	0.052	0.005
GEMS5	23.53	30.48	2.2	6.98	0.052	0.006
CIMBL78	23.52	31.03	2.24	8.2	0.053	0.006
CIMBL82	23.51	31.67	2.28	7.62	0.052	0.009
CIMBL110	23.49	31.6	2.23	6.89	0.053	0.008
MO17	23.49	28.02	2.25	7.39	0.051	0.011
Dan3130	23.49	29.12	2.24	7.94	0.051	0.025
CML361	23.48	31.57	2.24	7.83	0.053	0.005
DSB	23.48	28.95	2.25	8.88	0.051	0.006
BEM	23.47	28.54	2.25	7.58	0.051	0.005
CIMBL151	23.47	39.05	2.25	8.04	0.054	0.007
CML20	23.44	36.57	2.24	8.33	0.052	0.006
W138	23.43	29.25	2.24	7.81	0.052	0.006
Lv28	23.43	33.09	2.22	8.59	0.051	0.007
Ye488	23.41	29.52	2.31	9.52	0.051	0.014
Lx9801	23.4	26.91	2.24	7.19	0.052	0.008
CIMBL152	23.38	39.14	2.26	7.69	0.052	*
CML192	23.37	38.94	2.24	8.59	0.052	0.009
J4112	23.37	34.31	2.31	7.9	0.051	0.017
CML451	23.36	37.71	2.26	8.97	0.051	0.005
Liao138	23.33	27.54	2.28	7.7	0.051	0.024
Dan598	23.33	35.3	2.28	7.12	0.051	0.005
Si446	23.31	33.49	2.2	7.52	0.053	0.005
Ji53	23.29	26.35	2.25	6.56	0.051	0.014
CIMBL55	23.29	35.44	2.23	7.76	0.053	0.008
CIMBL125	23.29	31.12	2.23	8.97	0.054	0.007
Hua83-2	23.26	27.35	2.22	7.83	0.051	0.006
CIMBL128	23.25	37.65	2.28	7.49	0.051	0.012
Yu87-1	23.24	27.34	2.25	7.19	0.051	0.019
GEMS39	23.24	28.8	2.2	7.74	0.052	0.006
LY042	23.24	27.32	2.26	7.71	0.052	0.017
Ji853	23.23	29.51	2.27	8.75	0.051	0.006
CIMBL40	23.2	34.06	2.22	7.16	0.052	0.005
CML27	23.19	32.4	2.26	7.88	0.052	0.007
IRF314	23.19	33.32	2.25	6.61	0.051	0.008
CML470	23.19	26.41	2.24	8.69	0.054	0.007
CIMBL104	23.19	28.35	2.24	8.15	0.053	0.007
TY11	23.19	29.44	2.28	7.78	0.053	0.008
CML473	23.18	32.22	2.25	7.81	0.053	0.008
CIMBL42	23.14	42.07	2.21	7.97	0.053	0.006
CIMBL53	23.14	30.49	2.21	9.42	0.052	0.005
CML223	23.14	26.56	2.25	6.64	0.055	0.006
CML28	23.14	34.75	2.27	8.59	0.052	0.007
R15X1141	23.12	26.84	2.21	7.3	0.052	0.005
CIMBL76	23.12	32.21	2.21	8.86	0.052	0.006
835a	23.12	30.44	2.24	7.04	0.051	0.023
ZZ01	23.12	25.83	2.27	7.8	0.053	0.006
Zheng22	23.11	31.36	2.23	7.8	0.053	0.007
GEMS6	23.11	35.92	2.27	9.9	0.051	0.007
HuangC	23.1	27.11	2.2	8	0.051	0.005
CML432	23.09	30.34	2.33	8.53	0.054	0.006
CIMBL17	23.08	28.67	2.24	7.71	0.052	0.004
835b	23.07	29.68	2.25	6.82	0.051	0.022
ZB648	23.07	30.46	2.25	7.15	0.051	0.006
B73	23.07	29.84	2.27	6.66	0.051	0.005
CIMBL75	23.05	39.7	2.22	7.67	0.052	0.006
TY3	23.04	26.53	2.23	8.29	0.051	0.013
Ry684	23.01	33.46	2.23	7.45	0.051	0.033
TT16	23.01	25.71	2.22	6.86	0.051	0.006
Ye52106	22.99	33.2	2.26	7.93	0.055	0.006
Sy1032	22.98	28.83	2.27	6.83	0.053	0.009
Dan599	22.98	34.91	2.22	7.29	0.052	0.005
WH413	22.96	28.73	2.21	7.11	0.051	0.004
CIMBL4	22.96	36	2.28	7.76	0.052	0.01
CIMBL101	22.93	32.99	2.19	8.25	0.052	0.007
Zheng30	22.92	26.16	2.22	7	0.052	0.025
4019	22.92	30.61	2.28	6.62	0.052	0.005
Nan21-3	22.91	32.39	2.2	7.04	0.052	0.005
CIMBL26	22.91	35	2.25	6.82	0.052	0.006
CIMBL2	22.88	34.3	2.25	8.24	0.052	0.006
975-12	22.87	24.42	2.26	7.51	0.051	0.024
ES40	22.86	31.89	2.23	7.93	0.051	0.006
Si273	22.86	32.08	2.24	5.92	0.053	0.021
CML496	22.86	28.02	2.27	6.85	0.051	0.005
GY386B	22.86	29.37	2.22	7.33	0.052	0.006
1462	22.85	26.12	2.23	7.55	0.051	0.006
CML426	22.85	26.67	2.23	7.97	0.051	0.006
CML364	22.85	26.45	2.22	8.99	0.052	0.007
CML189	22.83	32.5	2.22	8.16	0.052	0.006
CIMBL7	22.81	30.84	2.25	6.49	0.051	0.007
GEMS31	22.81	34.42	2.27	9.35	0.051	0.006
Huangzaosi	22.79	31.34	2.31	8.27	0.051	0.004
Zong31	22.78	33.08	2.25	7.94	0.053	0.007
812	22.78	28.03	2.25	7.12	0.051	0.016
CIMBL142	22.77	29.51	2.21	10.02	0.052	0.005
Zheng29	22.77	26.11	2.25	6.81	0.051	0.013
TY4	22.77	25.76	2.28	7.31	0.051	0.021
CIMBL28	22.76	34.57	2.23	7.86	0.058	0.005
CIMBL124	22.75	29.47	2.24	7.97	0.052	0.005
CML327	22.74	33.68	2.23	7.81	0.052	0.005
GEMS55	22.74	31.61	2.25	7.56	0.053	0.007
B11	22.73	34.95	2.22	7.33	0.053	0.007
CML431	22.73	28.57	2.22	6.31	0.052	0.005
CIMBL24	22.72	29.4	2.22	7.23	0.052	*
MO113	22.7	27.03	2.23	7.77	0.052	0.007
WMR	22.7	31.32	2.23	7.81	0.051	0.021
LXN	22.7	23.99	2.26	7.27	0.051	0.007
GEMS18	22.69	29.88	2.3	8.38	0.051	0.005
CML465	22.66	31.83	2.23	6.91	0.052	0.006
3411	22.64	24.12	2.26	6.58	0.051	0.011
Sy1035	22.64	34.04	2.23	9.09	0.052	0.013
CIMBL115	22.63	37.1	2.23	7.32	0.052	0.006
CIMBL70	22.63	29.45	2.25	7.55	0.052	0.007
CIMBL68	22.62	26.5	2.27	9.97	0.052	0.006
BT1	22.62	33.8	2.23	7.33	0.053	0.007
GEMS14	22.61	29.34	2.23	7.94	0.053	0.005
HYS	22.61	30.35	2.25	7.83	0.053	0.006
832	22.6	27.1	2.23	7.83	0.052	0.009
GEMS13	22.6	28.1	2.21	7.21	0.051	0.01
CIMBL74	22.6	39.4	2.21	7.12	0.053	0.007
GEMS37	22.59	28.11	2.22	7.31	0.051	0.018
K12	22.58	29.61	2.23	7.52	0.052	0.007
CML486	22.58	32.23	2.21	8.75	0.052	0.007
TY8	22.56	31.82	2.22	8.14	0.051	0.007
CML282	22.55	27.93	2.27	8.04	0.053	0.007
CIMBL145	22.55	36.19	2.22	8.18	0.052	0.008
CIMBL25	22.55	32.81	2.17	6.94	0.051	0.007
CIMBL31	22.55	34.11	2.19	8.21	*	*
Liao5263	22.55	26.99	2.31	6.82	0.056	0.024
GEMS32	22.54	36.72	2.32	8.23	0.053	0.013
CIMBL20	22.54	31.32	2.3	7.78	0.052	0.006
SW92E114	22.53	31.48	2.26	9.57	0.051	0.019
CIMBL143	22.52	29.5	2.22	6.77	0.052	0.007
JY01	22.51	27.26	2.3	8.02	0.051	0.021
CIMBL10	22.5	28.62	2.23	8.48	0.051	0.009
R08	22.49	26.74	2.27	7.43	0.052	0.008
CIMBL51	22.48	31.85	2.25	7.31	0.054	0.007
CIMBL77	22.48	35.97	2.2	7.38	0.051	0.005
CIMBL38	22.48	32.53	2.28	8.44	0.052	0.028
GEMS2	22.47	27.67	2.2	6.79	0.052	0.007
CIMBL96	22.46	31.64	2.26	8.37	0.054	0.006
Dan340	22.46	26.25	2.23	6.67	0.049	0.009
CIMBL120	22.43	29.54	2.22	7.31	0.053	0.006
CIMBL32	22.42	28.94	2.22	7.33	0.052	0.026
CML454	22.39	35.29	2.17	7.17	0.052	0.006
Gy386	22.39	27.96	2.22	7.72	0.051	0.006
DH29	22.36	29.06	2.26	8.79	0.051	0.005
Cheng698	22.35	26.67	2.27	7.04	0.053	0.011
CIMBL118	22.35	30.34	2.24	6.55	0.052	0.006
238	22.33	27.71	2.22	7.37	0.053	0.006
Ye478	22.33	24.33	2.2	7	0.051	0.017
384-2	22.33	31.71	2.32	6.94	0.052	0.007
TY6	22.33	27.26	2.24	10.14	0.051	0.007
Ye8001	22.32	26.71	*	7.99	0.052	0.013
GEMS63	22.32	29.12	2.22	7.34	0.051	0.004
CIMBL97	22.3	37.13	2.25	7.52	0.052	0.008
CIMBL73	22.3	24.4	2.24	7.55	0.054	0.01
CML430	22.3	27.59	2.2	6.91	0.051	0.005
GEMS24	22.28	28.22	2.24	7.96	0.051	0.005
CIMBL60	22.28	28.96	2.23	7.47	0.052	0.008
Liao5114	22.26	25.69	2.23	8.05	0.051	0.017
BGY	22.25	26.56	2.19	7.56	0.052	0.005
CML433	22.25	31.56	2.22	6.98	0.052	0.006
CIMBL41	22.25	34.76	2.22	9.35	0.063	0.005
CIMBL23	22.23	36.51	2.23	7.25	0.052	0.008
LY	22.2	33.41	*	7.45	0.054	0.008
CIMBL12	22.19	33.33	2.2	8.11	0.052	0.01
TY1	22.18	30.26	2.2	7.7	0.051	0.007
Ji412	22.15	25.62	2.27	7.37	0.051	0.011
TY7	22.15	25.33	2.25	7.53	0.051	0.006
GEMS10	22.14	27.09	2.19	7.52	0.053	0.004
CIMBL105	22.13	39.11	2.23	7.44	0.052	0.005
Gy237	22.13	27.82	2.22	7.52	0.051	0.01
GEMS54	22.1	28.57	2.25	7.51	0.052	0.007
Ye515	22.1	28.54	2.3	7.54	0.051	0.006
CIMBL13	22.1	22.78	2.17	8.18	0.051	0.005
GEMS36	22.09	31.77	2.23	8.13	0.052	0.033
GEMS45	22.08	25.31	2.26	6.73	0.051	0.006
Si444	22.08	25.36	2.23	6.79	0.052	0.005
18-599	22.06	26.16	2.25	6.88	0.051	0.016
CIMBL3	22.05	29.1	2.2	9.71	0.052	0.006
GEMS16	22.04	23.98	2.22	7.59	0.052	0.006
1323	22.02	28.61	2.27	6.93	0.052	0.006
CIMBL92	22.02	31.27	2.26	8.17	0.053	0.01
CML290	22.02	29.28	2.23	8.21	0.052	0.006
GEMS3	22.01	32.58	2.28	8.46	0.053	0.027
CIMBL127	22	27.93	2.2	6.51	0.052	0.005
GEMS35	21.99	24.68	2.22	6.8	0.051	0.018
CML285	21.99	26.8	2.25	6.21	0.054	0.004
CIMBL129	21.97	34.71	2.23	7.61	0.052	0.007
BS16	21.95	29.55	2.21	7.13	0.051	0.007
CIMBL99	21.95	29.68	2.18	6.22	0.052	0.005
R15	21.95	29.98	2.23	8.81	0.052	0.005
CML32	21.95	28.85	2.22	7.59	0.052	0.006
GEMS20	21.93	38.61	2.27	7.53	0.053	0.006
Dan9046	21.92	29.39	2.25	7.82	0.052	0.023
CIMBL87	21.92	32.84	2.24	7.77	0.051	0.006
CML307	21.91	32.42	2.21	6.99	0.054	0.007
Zheng58	21.89	25.09	2.25	6.39	0.051	0.013
SC55	21.88	31.71	2.23	7.92	0.059	0.007
CML26	21.86	34.98	2.25	8	0.052	0.007
B77	21.82	28.74	2.32	9.37	0.052	0.008
CML168	21.81	33.44	2.19	8.76	0.052	0.034
CIMBL62	21.77	34.96	2.23	8.19	0.052	0.008
Zheng35	21.75	23.88	2.25	6.6	0.065	0.005
CIMBL141	21.73	26.06	2.23	7.46	0.054	0.009
GEMS1	21.72	27.31	2.21	7.12	0.068	0.006
GEMS42	21.7	28.21	2.2	6.61	0.054	0.006
Xun971	21.7	24.27	2.29	7.13	0.051	0.02
Yu12	21.69	29.22	2.24	8.1	0.051	0.01
U8112	21.67	25.16	2.25	6.19	0.051	0.021
CIMBL5	21.66	27.48	*	7.35	*	*
CIMBL122	21.63	23.22	2.17	7.02	0.052	0.005
CIMBL48	21.63	27.93	2.18	6.78	0.055	0.008
SK	21.62	30.79	2.28	9.9	0.052	0.009
5213	21.61	26.09	2.22	7.79	0.053	0.005
GEMS59	21.6	23.93	2.23	5.97	0.053	0.016
chuan48-2	21.6	30.65	2.25	7.77	0.052	0.008
Wu109	21.59	24.72	2.3	7.48	0.052	0.005
Shen137	21.56	28.72	2.23	7.92	0.054	0.018
Shen5003	21.55	27.62	2.21	7.51	0.051	0.005
M153	21.54	26.23	2.29	7.66	0.051	0.005
JH59	21.54	30.9	2.19	7.35	0.053	0.011
P138	21.54	28.14	2.24	7.23	0.051	0.019
CML497	21.53	27.65	2.19	7.24	0.052	0.006
CIMBL8	21.52	25.21	2.22	7.84	0.051	0.005
JH96C	21.46	26.69	2.19	7.42	0.052	0.005
B114	21.46	26.66	2.21	7.45	0.052	0.018
CIMBL138	21.45	26.58	2.18	8.92	0.052	0.006
GEMS28	21.45	27.76	2.3	6.44	0.058	0.006
GEMS57	21.42	30.74	2.26	7.91	0.051	0.004
DH3732	21.42	26.12	2.24	7.63	0.051	0.005
05W002	21.42	29.8	2.2	7.72	0.051	0.005
K10	21.41	26.88	2.24	7.13	0.053	0.005
GEMS50	21.41	26.33	2.21	7.04	0.051	0.009
7327	21.4	25.42	2.25	6.88	0.058	0.005
B151	21.4	26.93	2.24	6.88	0.051	0.009
Yu374	21.38	27.19	2.29	6.75	0.052	0.008
CIMBL144	21.35	26.29	2.16	6.71	0.052	0.005
07KS4	21.34	29.09	2.23	6.84	0.053	0.015
CIMBL33	21.33	28.28	2.19	8.08	0.052	0.005
04K5672	21.3	29.53	2.22	7.7	0.052	0.017
CML468	21.29	29.74	2.28	7.23	0.054	0.005
GEMS44	21.28	27.69	2.26	8.42	0.051	0.008
M97	21.28	24.8	2.24	7.7	0.051	0.004
CIMBL9	21.26	24.41	2.16	7.1	0.053	0.005
CIMBL80	21.25	26.11	2.26	7.64	0.051	0.006
LG001	21.24	28.27	2.3	6.7	0.054	0.019
Qi318	21.23	25.55	2.22	7.15	0.052	0.018
CML360	21.23	28.91	2.22	8.72	0.052	0.006
268	21.23	25.79	2.25	8.29	0.052	0.014
CIMBL81	21.21	31.3	2.22	6.66	0.056	0.005
Zheng32	21.19	25.66	2.33	6.56	0.054	0.021
CIMBL117	21.19	34.82	2.33	9.73	0.052	0.009
CIMBL45	21.15	26.87	2.28	7.44	0.052	0.006
526018	21.15	24.52	2.23	8.03	0.054	0.005
9782	21.14	27.12	2.23	7.95	0.052	0.012
Gy1032	21.14	25.35	2.26	7.44	0.051	0.005
Dan4245	21.11	31.86	2.24	6.95	0.051	0.005
GEMS51	21.08	27.59	2.21	7.39	0.052	0.005
GEMS41	21.07	29.44	2.21	7.37	0.051	0.005
GEMS40	21.06	24.57	2.21	7.03	0.052	0.005
CIMBL88	21.04	32.69	2.22	6.98	0.053	0.006
CML286	21.03	28.09	2.21	6.74	0.052	0.006
GEMS56	21.02	28.16	2.23	7.59	0.055	0.013
B110	21.02	22.16	2.26	7.4	0.051	0.005
CA339	21	31.34	2.28	7.07	0.05	0.006
Liao159	21	26.74	2.22	7.56	0.052	0.005
Dan360	20.97	24.71	2.21	7.18	0.051	0.008
Ji81162	20.96	29.27	2.25	6.35	0.051	0.016
CIMBL131	20.95	29.08	2.21	7.46	0.051	0.005
CIMBL61	20.94	30.61	2.25	8	0.054	0.006
CML479	20.94	33.27	2.24	6.74	0.053	0.005
CML118	20.93	27.7	2.23	7.2	0.053	0.02
CML51	20.92	26.89	2.16	6.7	0.052	0.005
177	20.88	27.92	2.22	6.93	0.051	0.019
05WN230	20.86	26.72	2.3	6.62	0.052	0.006
7381	20.85	27.12	2.2	7.17	0.051	0.019
EN25	20.84	28.9	2.27	7.3	0.052	0.005
CIMBL27	20.83	31.63	2.24	6.36	0.052	0.006
CIMBL93	20.83	27.99	2.27	8.57	0.055	0.006
FCD0602	20.82	26.03	2.23	7.31	0.053	0.012
ZZ03	20.78	25.71	2.22	7.16	0.052	0.02
CIMBL59	20.77	28.42	2.21	7.21	0.051	0.005
H21	20.76	28.59	2.21	7.44	0.055	0.007
S22	20.74	25.74	2.26	7.41	0.053	0.005
K22	20.72	25.44	2.25	6.71	0.053	0.012
GEMS30	20.72	31.16	2.23	6.65	0.052	0.006
CIMBL18	20.72	34.21	2.17	7.53	0.052	0.005
CIMBL114	20.7	34.27	2.18	7.7	0.052	0.006
GEMS66	20.66	29.9	2.26	6.58	0.052	0.006
CML162	20.65	31.95	2.21	7.84	0.055	0.007
Ji842	20.59	28.93	2.25	6.89	0.052	0.007
P178	20.57	27.08	2.25	7.11	0.052	0.016
GEMS4	20.57	25.88	2.26	7.08	0.051	0.005
CF3	20.57	26.68	2.24	6.89	0.052	0.009
CML116	20.57	29.87	2.2	7.5	0.052	0.006
Ji846	20.56	30.59	2.23	7.51	0.053	0.005
CML163	20.55	28.3	2.22	6.53	0.055	0.005
CIMBL65	20.51	27.55	2.17	6.8	0.053	0.006
GEMS25	20.47	26.92	2.24	7.07	0.051	0.005
GEMS27	20.45	25.83	2.28	8	0.051	0.007
Qi319	20.44	27.32	2.26	6.9	0.051	0.023
CML493	20.43	35.2	2.21	8.94	0.053	0.005
TY2	20.4	29.54	2.22	8.66	0.051	0.008
GEMS29	20.4	27.82	2.22	7.48	0.052	0.005
GEMS48	20.39	25.36	2.22	6.77	0.053	0.009
GEMS21	20.38	31.24	2.25	8.49	0.051	0.005
CIMBL19	20.33	30.24	2.28	7.76	0.054	0.006
CIMBL71	20.26	30.61	2.23	7.01	0.053	0.005
Qi205	20.25	31.62	2.22	9.05	0.052	0.023
CIMBL49	20.25	30.26	2.29	7.55	0.052	0.005
Q1261	20.22	28.08	2.26	7.42	0.051	0.005
Tie7922	20.22	24.93	2.23	6.71	0.049	0.015
GEMS58	20.19	29.93	2.26	9.07	0.052	0.008
M165	20.18	26.62	2.28	6.44	0.052	0.005
GEMS52	20.17	28.11	2.27	7.7	0.052	0.005
GEMS11	20.15	25.99	2.24	8.8	0.052	0.005
Zheng28	20.15	26.62	2.29	7.07	0.051	0.005
B111	20.1	26.35	2.2	7.95	0.051	0.007
DE.EX	20.07	24.5	2.26	6.61	0.051	0.033
CI7	20.07	27.3	2.28	9.22	0.051	0.006
GEMS43	20.05	27.38	2.31	7.49	0.053	0.025
HB	20.01	27.19	2.25	8.01	0.051	0.005
CML171	19.83	27.11	2.27	7.3	0.051	0.007
CIMBL46	19.82	29.55	2.22	7.21	0.052	0.006
Ry729	19.76	26.55	2.25	6.73	0.051	0.005
CIMBL22	19.76	32.54	2.16	8.23	0.052	0.008
CML172	19.75	27.43	2.25	8.33	0.052	0.008
B113	19.7	26.19	2.24	7.74	0.051	0.005
GEMS23	19.67	28.13	2.29	7.1	0.053	0.005
CML289	19.65	28.95	2.25	8.57	0.052	0.006
CML166	19.61	27.12	2.21	6.32	0.052	0.005
8902	19.57	27.32	2.27	7.2	0.052	0.016
Ji63	19.47	25.63	2.21	9.16	0.052	0.004
Ye107	19.42	27.16	2.25	7.57	0.056	0.02
GEMS33	19.41	27.6	2.25	7.92	0.053	0.033
TY5	19.27	21.78	2.2	8.12	0.052	0.009
GEMS9	19.22	25.47	2.21	8.53	0.052	0.005
81162	18.98	26.51	2.23	7.71	0.051	0.004
X178	18.95	27.07	2.28	7.27	0.052	0.018
L3180	18.73	23.37	2.22	7.43	0.051	0.005

## Sheet: Zn
id	X.Intercept.
150	28.4449	Zn
177	27.9172	Zn
238	27.7131	Zn
268	25.7921	Zn
501	30.4127	Zn
812	28.0282	Zn
832	27.0969	Zn
1323	28.6077	Zn
1462	26.1153	Zn
3411	24.1153	Zn
4019	30.6099	Zn
5213	26.0872	Zn
5237	26.4008	Zn
5311	31.5983	Zn
7327	25.4245	Zn
7381	27.1155	Zn
8902	27.3215	Zn
9642	30.0693	Zn
9782	27.1221	Zn
81162	26.5144	Zn
526018	24.5232	Zn
04K5672	29.5314	Zn
04K5686	33.8439	Zn
04K5702	30.654	Zn
05W002	29.8004	Zn
05WN230	26.7187	Zn
07KS4	29.0934	Zn
18-599	26.1614	Zn
303WX	27.9351	Zn
384-2	31.7085	Zn
4F1	31.2583	Zn
835a	30.4427	Zn
835b	29.6817	Zn
975-12	24.4184	Zn
A619	34.4967	Zn
B11	34.9474	Zn
B110	22.1601	Zn
B111	26.3521	Zn
B113	26.1949	Zn
B114	26.6587	Zn
B151	26.9296	Zn
B73	29.8375	Zn
B77	28.7362	Zn
BEM	28.5424	Zn
BGY	26.5597	Zn
BS16	29.5521	Zn
BT1	33.8033	Zn
By4839	32.9923	Zn
By4944	32.5332	Zn
By4960	42.2016	Zn
By804	30.8937	Zn
By807	32.299	Zn
By809	30.532	Zn
By815	30.4079	Zn
By843	38.453	Zn
By855	32.6325	Zn
C8605	26.9637	Zn
CA339	31.3356	Zn
CF3	26.6751	Zn
Chang7-2	30.7546	Zn
Cheng698	26.6709	Zn
chuan48-2	30.6538	Zn
CI7	27.3048	Zn
CIMBL1	37.634	Zn
CIMBL10	28.619	Zn
CIMBL101	32.9892	Zn
CIMBL104	28.3466	Zn
CIMBL105	39.107	Zn
CIMBL106	25.8339	Zn
CIMBL107	30.4375	Zn
CIMBL108	42.1929	Zn
CIMBL109	29.3974	Zn
CIMBL11	41.0329	Zn
CIMBL110	31.6044	Zn
CIMBL111	34.4148	Zn
CIMBL112	36.8193	Zn
CIMBL113	34.8989	Zn
CIMBL114	34.2657	Zn
CIMBL115	37.0986	Zn
CIMBL116	35.8907	Zn
CIMBL117	34.8171	Zn
CIMBL118	30.345	Zn
CIMBL119	35.3043	Zn
CIMBL12	33.3344	Zn
CIMBL120	29.5409	Zn
CIMBL121	30.0894	Zn
CIMBL122	23.2223	Zn
CIMBL124	29.4654	Zn
CIMBL125	31.1224	Zn
CIMBL126	39.0858	Zn
CIMBL127	27.925	Zn
CIMBL128	37.6539	Zn
CIMBL129	34.7072	Zn
CIMBL13	22.7832	Zn
CIMBL130	30.8294	Zn
CIMBL131	29.0773	Zn
CIMBL133	29.0605	Zn
CIMBL135	41.0856	Zn
CIMBL136	33.645	Zn
CIMBL137	43.0094	Zn
CIMBL138	26.5794	Zn
CIMBL139	30.5624	Zn
CIMBL140	30.0129	Zn
CIMBL141	26.0633	Zn
CIMBL142	29.5134	Zn
CIMBL143	29.4955	Zn
CIMBL144	26.2912	Zn
CIMBL145	36.1861	Zn
CIMBL146	33.9324	Zn
CIMBL147	31.2911	Zn
CIMBL148	31.5327	Zn
CIMBL150	28.2529	Zn
CIMBL151	39.0503	Zn
CIMBL152	39.1419	Zn
CIMBL153	37.0565	Zn
CIMBL154	35.8858	Zn
CIMBL155	44.2624	Zn
CIMBL157	36.0127	Zn
CIMBL16	33.8739	Zn
CIMBL17	28.6658	Zn
CIMBL18	34.2145	Zn
CIMBL19	30.2379	Zn
CIMBL2	34.3034	Zn
CIMBL20	31.3168	Zn
CIMBL21	32.6722	Zn
CIMBL22	32.5401	Zn
CIMBL23	36.5104	Zn
CIMBL24	29.4048	Zn
CIMBL25	32.806	Zn
CIMBL26	35.0049	Zn
CIMBL27	31.6262	Zn
CIMBL28	34.5666	Zn
CIMBL29	27.8515	Zn
CIMBL3	29.1026	Zn
CIMBL30	28.1481	Zn
CIMBL31	34.1072	Zn
CIMBL32	28.9365	Zn
CIMBL33	28.2819	Zn
CIMBL34	28.7341	Zn
CIMBL36	42.0343	Zn
CIMBL37	38.3767	Zn
CIMBL38	32.5307	Zn
CIMBL39	27.7407	Zn
CIMBL4	35.9959	Zn
CIMBL40	34.059	Zn
CIMBL41	34.7637	Zn
CIMBL42	42.0669	Zn
CIMBL43	45.0266	Zn
CIMBL44	34.1983	Zn
CIMBL45	26.8718	Zn
CIMBL46	29.5485	Zn
CIMBL47	34.0031	Zn
CIMBL48	27.9269	Zn
CIMBL49	30.2589	Zn
CIMBL5	27.4756	Zn
CIMBL51	31.8496	Zn
CIMBL52	40.514	Zn
CIMBL53	30.4942	Zn
CIMBL54	33.071	Zn
CIMBL55	35.4408	Zn
CIMBL56	31.7337	Zn
CIMBL57	35.5372	Zn
CIMBL58	33.504	Zn
CIMBL59	28.4164	Zn
CIMBL60	28.9564	Zn
CIMBL61	30.6069	Zn
CIMBL62	34.9643	Zn
CIMBL63	31.9501	Zn
CIMBL65	27.5543	Zn
CIMBL66	33.1253	Zn
CIMBL67	26.0954	Zn
CIMBL68	26.497	Zn
CIMBL69	33.4468	Zn
CIMBL7	30.8414	Zn
CIMBL70	29.4491	Zn
CIMBL71	30.6136	Zn
CIMBL72	32.9713	Zn
CIMBL73	24.3986	Zn
CIMBL74	39.3985	Zn
CIMBL75	39.6993	Zn
CIMBL76	32.2079	Zn
CIMBL77	35.97	Zn
CIMBL78	31.0341	Zn
CIMBL79	33.7691	Zn
CIMBL8	25.2069	Zn
CIMBL80	26.1063	Zn
CIMBL81	31.2955	Zn
CIMBL82	31.6696	Zn
CIMBL83	30.3957	Zn
CIMBL85	39.1879	Zn
CIMBL86	41.6471	Zn
CIMBL87	32.8385	Zn
CIMBL88	32.6942	Zn
CIMBL89	35.0579	Zn
CIMBL9	24.4105	Zn
CIMBL90	37.1407	Zn
CIMBL91	37.4093	Zn
CIMBL92	31.273	Zn
CIMBL93	27.9855	Zn
CIMBL94	35.8758	Zn
CIMBL95	31.7708	Zn
CIMBL96	31.6356	Zn
CIMBL97	37.132	Zn
CIMBL98	33.897	Zn
CIMBL99	29.6842	Zn
CML113	45.1828	Zn
CML114	41.9172	Zn
CML115	38.7336	Zn
CML116	29.8655	Zn
CML118	27.7047	Zn
CML121	27.3288	Zn
CML122	32.7476	Zn
CML130	32.4692	Zn
CML134	31.8979	Zn
CML139	32.4624	Zn
CML162	31.9518	Zn
CML163	28.3007	Zn
CML165	38.0445	Zn
CML166	27.1204	Zn
CML168	33.4353	Zn
CML169	38.1412	Zn
CML170	30.9296	Zn
CML171	27.1127	Zn
CML172	27.4335	Zn
CML189	32.5022	Zn
CML191	30.2362	Zn
CML192	38.9449	Zn
CML20	36.5749	Zn
CML223	26.5564	Zn
CML225	33.05	Zn
CML226	38.5225	Zn
CML228	31.0928	Zn
CML26	34.9807	Zn
CML27	32.3965	Zn
CML28	34.7496	Zn
CML282	27.9267	Zn
CML285	26.7978	Zn
CML286	28.0881	Zn
CML287	34.4265	Zn
CML289	28.9521	Zn
CML29	28.7656	Zn
CML290	29.2754	Zn
CML298	35.3454	Zn
CML304	34.1573	Zn
CML307	32.419	Zn
CML31	32.9106	Zn
CML32	28.8505	Zn
CML323	31.4211	Zn
CML324	37.6122	Zn
CML325	35.1911	Zn
CML326	33.711	Zn
CML327	33.6834	Zn
CML360	28.9147	Zn
CML361	31.5688	Zn
CML364	26.4462	Zn
CML40	25.387	Zn
CML408	34.1262	Zn
CML411	35.831	Zn
CML415	39.1533	Zn
CML422	35.2799	Zn
CML423	32.3336	Zn
CML426	26.6712	Zn
CML430	27.5851	Zn
CML431	28.5671	Zn
CML432	30.3427	Zn
CML433	31.5578	Zn
CML451	37.71	Zn
CML454	35.2943	Zn
CML465	31.8295	Zn
CML468	29.7407	Zn
CML470	26.4059	Zn
CML473	32.2153	Zn
CML479	33.273	Zn
CML480	27.7466	Zn
CML486	32.2291	Zn
CML493	35.199	Zn
CML496	28.0176	Zn
CML497	27.6516	Zn
CML50	28.9903	Zn
CML51	26.8928	Zn
CML69	34.3285	Zn
CN962	33.6172	Zn
CY72	24.0502	Zn
D047	31.5344	Zn
D863F	31.8736	Zn
Dan3130	29.1175	Zn
Dan340	26.2465	Zn
Dan360	24.709	Zn
Dan4245	31.8593	Zn
Dan598	35.3042	Zn
Dan599	34.9137	Zn
Dan9046	29.3921	Zn
DE.EX	24.4966	Zn
DH29	29.0649	Zn
DH3732	26.1192	Zn
Dong237	31.1391	Zn
Dong46	36.271	Zn
DSB	28.9547	Zn
EN25	28.9026	Zn
ES40	31.8922	Zn
FCD0602	26.0323	Zn
GEMS1	27.3141	Zn
GEMS10	27.0907	Zn
GEMS11	25.9856	Zn
GEMS13	28.1037	Zn
GEMS14	29.3387	Zn
GEMS15	31.6885	Zn
GEMS16	23.9756	Zn
GEMS17	29.4663	Zn
GEMS18	29.8751	Zn
GEMS19	28.9985	Zn
GEMS2	27.6675	Zn
GEMS20	38.6145	Zn
GEMS21	31.236	Zn
GEMS23	28.1254	Zn
GEMS24	28.2202	Zn
GEMS25	26.9162	Zn
GEMS27	25.8251	Zn
GEMS28	27.7564	Zn
GEMS29	27.8215	Zn
GEMS3	32.576	Zn
GEMS30	31.1582	Zn
GEMS31	34.4179	Zn
GEMS32	36.7187	Zn
GEMS33	27.6016	Zn
GEMS35	24.6778	Zn
GEMS36	31.7724	Zn
GEMS37	28.1116	Zn
GEMS39	28.7959	Zn
GEMS4	25.8768	Zn
GEMS40	24.5695	Zn
GEMS41	29.4415	Zn
GEMS42	28.2133	Zn
GEMS43	27.3815	Zn
GEMS44	27.6861	Zn
GEMS45	25.3138	Zn
GEMS47	32.3724	Zn
GEMS48	25.3585	Zn
GEMS5	30.4775	Zn
GEMS50	26.3272	Zn
GEMS51	27.5933	Zn
GEMS52	28.111	Zn
GEMS53	32.7269	Zn
GEMS54	28.5706	Zn
GEMS55	31.6106	Zn
GEMS56	28.1579	Zn
GEMS57	30.7361	Zn
GEMS58	29.9326	Zn
GEMS59	23.9279	Zn
GEMS6	35.9224	Zn
GEMS61	31.0452	Zn
GEMS62	34.2826	Zn
GEMS63	29.1183	Zn
GEMS64	34.754	Zn
GEMS65	35.8792	Zn
GEMS66	29.8987	Zn
GEMS9	25.472	Zn
Gy1032	25.3454	Zn
Gy220	32.2581	Zn
Gy237	27.8208	Zn
Gy386	27.9635	Zn
GY386B	29.3716	Zn
Gy462	31.4381	Zn
H21	28.5919	Zn
HB	27.1902	Zn
HTH-17	31.1552	Zn
Hua83-2	27.3542	Zn
HuangC	27.1062	Zn
Huangzaosi	31.3422	Zn
HYS	30.3521	Zn
IRF291	30.6394	Zn
IRF314	33.323	Zn
J4112	34.3146	Zn
JH59	30.9034	Zn
JH96C	26.6866	Zn
Ji412	25.6212	Zn
Ji53	26.3505	Zn
Ji63	25.6318	Zn
Ji81162	29.2716	Zn
Ji842	28.9301	Zn
Ji846	30.5898	Zn
Ji853	29.506	Zn
Jiao51	30.4512	Zn
JY01	27.2564	Zn
K10	26.8754	Zn
K12	29.6085	Zn
K22	25.4422	Zn
L3180	23.3663	Zn
LG001	28.2729	Zn
Liao138	27.5397	Zn
Liao159	26.7411	Zn
Liao5114	25.6853	Zn
Liao5262	28.983	Zn
Liao5263	26.9918	Zn
LK11	28.3494	Zn
Lv28	33.0936	Zn
Lx9801	26.911	Zn
LXN	23.9911	Zn
LY	33.4119	Zn
LY042	27.322	Zn
M153	26.2301	Zn
M165	26.6244	Zn
M97	24.7958	Zn
MN	31.486	Zn
MO113	27.0313	Zn
Mo17	29.8228	Zn
MO17	28.0223	Zn
Nan21-3	32.388	Zn
NMJT	28.0328	Zn
P138	28.1429	Zn
P178	27.0769	Zn
Q1261	28.0832	Zn
Qi205	31.6169	Zn
Qi318	25.55	Zn
Qi319	27.318	Zn
R08	26.7439	Zn
R15	29.9763	Zn
R15X1141	26.8382	Zn
Ry684	33.4615	Zn
Ry697	33.7853	Zn
Ry729	26.5485	Zn
S22	25.7414	Zn
SC55	31.7084	Zn
Shen137	28.7212	Zn
Shen5003	27.6222	Zn
Si273	32.0847	Zn
Si444	25.3587	Zn
Si446	33.4898	Zn
SK	30.7901	Zn
SW1611	27.4607	Zn
SW92E114	31.4782	Zn
Sy1032	28.8256	Zn
Sy1035	34.0366	Zn
Sy1039	32.9232	Zn
Sy1052	38.4947	Zn
Sy1077	39.2595	Zn
Sy1128	38.0528	Zn
Sy3073	33.0195	Zn
Sy999	32.7031	Zn
Tian77	29.5029	Zn
Tie7922	24.9262	Zn
TT16	25.7052	Zn
TX5	34.66	Zn
TY1	30.2565	Zn
TY10	30.6075	Zn
TY11	29.4378	Zn
TY2	29.535	Zn
TY3	26.5257	Zn
TY4	25.7555	Zn
TY5	21.7769	Zn
TY6	27.2611	Zn
TY7	25.3297	Zn
TY8	31.8243	Zn
TY9	34.1195	Zn
U8112	25.164	Zn
W138	29.253	Zn
WH413	28.7287	Zn
WMR	31.319	Zn
Wu109	24.72	Zn
X178	27.0721	Zn
Xun971	24.2666	Zn
XZ698	28.678	Zn
Yan414	29.5508	Zn
Ye107	27.1613	Zn
Ye478	24.3271	Zn
Ye488	29.5189	Zn
Ye515	28.544	Zn
Ye52106	33.1989	Zn
Ye8001	26.7144	Zn
Yu12	29.2225	Zn
Yu374	27.1908	Zn
Yu87-1	27.3439	Zn
Z2018F	27.5247	Zn
ZaC546	31.6464	Zn
ZB648	30.4584	Zn
Zheng22	31.3557	Zn
Zheng28	26.6205	Zn
Zheng29	26.1065	Zn
Zheng30	26.1641	Zn
Zheng32	25.6607	Zn
Zheng35	23.8767	Zn
Zheng58	25.0906	Zn
Zheng653	27.9274	Zn
Zhi41	31.762	Zn
Zhong69	30.6823	Zn
Zi330	33.0337	Zn
Zong31	33.0779	Zn
ZZ01	25.8267	Zn
ZZ03	25.712	Zn

## Sheet: Cu
id	X.Intercept.
150	2.24865	Cu
177	2.21796	Cu
238	2.22149	Cu
268	2.24819	Cu
501	2.23048	Cu
812	2.25235	Cu
832	2.23491	Cu
1323	2.27405	Cu
1462	2.22782	Cu
3411	2.25732	Cu
4019	2.27643	Cu
5213	2.21575	Cu
5237	2.20886	Cu
5311	2.25076	Cu
7327	2.24792	Cu
7381	2.20159	Cu
8902	2.2744	Cu
9642	2.24798	Cu
9782	2.22762	Cu
81162	2.23268	Cu
526018	2.23307	Cu
04K5672	2.22386	Cu
04K5686	2.23959	Cu
04K5702	2.25879	Cu
05W002	2.20191	Cu
05WN230	2.29613	Cu
07KS4	2.22707	Cu
18-599	2.25176	Cu
303WX	2.27985	Cu
384-2	2.32318	Cu
4F1	2.21352	Cu
835a	2.24348	Cu
835b	2.24821	Cu
975-12	2.26222	Cu
A619	2.29411	Cu
B11	2.22395	Cu
B110	2.25544	Cu
B111	2.19599	Cu
B113	2.23664	Cu
B114	2.20663	Cu
B151	2.23704	Cu
B73	2.26794	Cu
B77	2.32197	Cu
BEM	2.2456	Cu
BGY	2.18942	Cu
BS16	2.21244	Cu
BT1	2.22534	Cu
By4839	2.28962	Cu
By4944	2.25117	Cu
By4960	2.30997	Cu
By804	2.221	Cu
By807	2.2262	Cu
By809	2.22154	Cu
By815	2.21457	Cu
By843	2.20215	Cu
By855	2.30457	Cu
C8605	2.27411	Cu
CA339	2.28107	Cu
CF3	2.23647	Cu
Chang7-2	2.28897	Cu
Cheng698	2.2676	Cu
chuan48-2	2.25147	Cu
CI7	2.28182	Cu
CIMBL1	2.21574	Cu
CIMBL10	2.22597	Cu
CIMBL101	2.18528	Cu
CIMBL104	2.23816	Cu
CIMBL105	2.23145	Cu
CIMBL106	2.18994	Cu
CIMBL107	2.21847	Cu
CIMBL108	2.22756	Cu
CIMBL109	2.2167	Cu
CIMBL11	2.23697	Cu
CIMBL110	2.23056	Cu
CIMBL111	2.21726	Cu
CIMBL112	2.27839	Cu
CIMBL113	2.23561	Cu
CIMBL114	2.1778	Cu
CIMBL115	2.22544	Cu
CIMBL116	2.25156	Cu
CIMBL117	2.33103	Cu
CIMBL118	2.24258	Cu
CIMBL119	2.21971	Cu
CIMBL12	2.20323	Cu
CIMBL120	2.21957	Cu
CIMBL121	2.23452	Cu
CIMBL122	2.16581	Cu
CIMBL124	2.2411	Cu
CIMBL125	2.23059	Cu
CIMBL126	2.21086	Cu
CIMBL127	2.19772	Cu
CIMBL128	2.27794	Cu
CIMBL129	2.22889	Cu
CIMBL13	2.17472	Cu
CIMBL130	2.26639	Cu
CIMBL131	2.21285	Cu
CIMBL133	2.25863	Cu
CIMBL135	2.28901	Cu
CIMBL136	2.24172	Cu
CIMBL137	2.23104	Cu
CIMBL138	2.17518	Cu
CIMBL139	2.25082	Cu
CIMBL140	2.21164	Cu
CIMBL141	2.2323	Cu
CIMBL142	2.20944	Cu
CIMBL143	2.22017	Cu
CIMBL144	2.16428	Cu
CIMBL145	2.21523	Cu
CIMBL146	2.28692	Cu
CIMBL147	2.22724	Cu
CIMBL148	2.21824	Cu
CIMBL150	2.22919	Cu
CIMBL151	2.24761	Cu
CIMBL152	2.25921	Cu
CIMBL153	2.25918	Cu
CIMBL154	2.26137	Cu
CIMBL155	2.23907	Cu
CIMBL157	2.23349	Cu
CIMBL16	2.21326	Cu
CIMBL17	2.24181	Cu
CIMBL18	2.16888	Cu
CIMBL19	2.27557	Cu
CIMBL2	2.25484	Cu
CIMBL20	2.30091	Cu
CIMBL21	2.23669	Cu
CIMBL22	2.16365	Cu
CIMBL23	2.23323	Cu
CIMBL24	2.22096	Cu
CIMBL25	2.16988	Cu
CIMBL26	2.24966	Cu
CIMBL27	2.23719	Cu
CIMBL28	2.23042	Cu
CIMBL29	2.23512	Cu
CIMBL3	2.19738	Cu
CIMBL30	2.23582	Cu
CIMBL31	2.18888	Cu
CIMBL32	2.22433	Cu
CIMBL33	2.19028	Cu
CIMBL34	2.18478	Cu
CIMBL36	2.27493	Cu
CIMBL37	2.22937	Cu
CIMBL38	2.27606	Cu
CIMBL39	2.246	Cu
CIMBL4	2.27619	Cu
CIMBL40	2.22091	Cu
CIMBL41	2.22421	Cu
CIMBL42	2.20621	Cu
CIMBL43	2.27071	Cu
CIMBL44	2.21778	Cu
CIMBL45	2.28337	Cu
CIMBL46	2.21777	Cu
CIMBL47	2.19895	Cu
CIMBL48	2.17566	Cu
CIMBL49	2.29341	Cu
CIMBL51	2.24932	Cu
CIMBL52	2.2076	Cu
CIMBL53	2.20614	Cu
CIMBL54	2.28176	Cu
CIMBL55	2.2262	Cu
CIMBL57	2.21377	Cu
CIMBL58	2.21504	Cu
CIMBL59	2.20603	Cu
CIMBL60	2.23046	Cu
CIMBL61	2.24853	Cu
CIMBL62	2.22853	Cu
CIMBL63	2.33165	Cu
CIMBL65	2.17107	Cu
CIMBL66	2.28005	Cu
CIMBL67	2.1765	Cu
CIMBL68	2.26517	Cu
CIMBL7	2.25188	Cu
CIMBL70	2.24814	Cu
CIMBL71	2.22581	Cu
CIMBL72	2.23028	Cu
CIMBL73	2.24442	Cu
CIMBL74	2.21427	Cu
CIMBL75	2.21878	Cu
CIMBL76	2.20945	Cu
CIMBL77	2.20151	Cu
CIMBL78	2.24047	Cu
CIMBL79	2.20989	Cu
CIMBL8	2.21989	Cu
CIMBL80	2.25744	Cu
CIMBL81	2.22143	Cu
CIMBL82	2.28046	Cu
CIMBL83	2.23367	Cu
CIMBL85	2.27558	Cu
CIMBL86	2.24237	Cu
CIMBL87	2.24495	Cu
CIMBL88	2.21519	Cu
CIMBL89	2.26645	Cu
CIMBL9	2.16159	Cu
CIMBL90	2.26466	Cu
CIMBL91	2.20982	Cu
CIMBL92	2.25678	Cu
CIMBL93	2.27197	Cu
CIMBL94	2.21633	Cu
CIMBL95	2.27413	Cu
CIMBL96	2.25705	Cu
CIMBL97	2.25181	Cu
CIMBL98	2.32246	Cu
CIMBL99	2.17594	Cu
CML113	2.22093	Cu
CML114	2.27669	Cu
CML115	2.2396	Cu
CML116	2.19507	Cu
CML118	2.22809	Cu
CML121	2.19506	Cu
CML122	2.17861	Cu
CML130	2.24418	Cu
CML134	2.23709	Cu
CML139	2.2043	Cu
CML162	2.21187	Cu
CML163	2.22281	Cu
CML165	2.18876	Cu
CML166	2.2149	Cu
CML168	2.19442	Cu
CML169	2.28252	Cu
CML170	2.28089	Cu
CML171	2.26552	Cu
CML172	2.25171	Cu
CML189	2.22429	Cu
CML191	2.26578	Cu
CML192	2.24369	Cu
CML20	2.24406	Cu
CML223	2.25356	Cu
CML225	2.2788	Cu
CML226	2.19594	Cu
CML228	2.29653	Cu
CML26	2.25103	Cu
CML27	2.2577	Cu
CML28	2.26832	Cu
CML282	2.26608	Cu
CML285	2.25123	Cu
CML286	2.20765	Cu
CML287	2.17617	Cu
CML289	2.2512	Cu
CML29	2.18989	Cu
CML290	2.22898	Cu
CML298	2.2418	Cu
CML304	2.23208	Cu
CML307	2.21045	Cu
CML31	2.28038	Cu
CML32	2.21919	Cu
CML323	2.19615	Cu
CML324	2.27598	Cu
CML325	2.23745	Cu
CML326	2.24754	Cu
CML327	2.23351	Cu
CML360	2.2177	Cu
CML361	2.2428	Cu
CML364	2.22229	Cu
CML40	2.24058	Cu
CML408	2.18658	Cu
CML411	2.2584	Cu
CML415	2.27968	Cu
CML422	2.27517	Cu
CML423	2.25597	Cu
CML426	2.22954	Cu
CML430	2.20063	Cu
CML431	2.21936	Cu
CML432	2.32529	Cu
CML433	2.22358	Cu
CML451	2.26197	Cu
CML454	2.1735	Cu
CML465	2.23434	Cu
CML468	2.28228	Cu
CML470	2.24077	Cu
CML473	2.24843	Cu
CML479	2.23908	Cu
CML480	2.17387	Cu
CML486	2.21463	Cu
CML493	2.20916	Cu
CML496	2.26957	Cu
CML497	2.19134	Cu
CML50	2.26015	Cu
CML51	2.16347	Cu
CML69	2.26254	Cu
CN962	2.23568	Cu
CY72	2.2282	Cu
D047	2.26333	Cu
D863F	2.29277	Cu
Dan3130	2.24292	Cu
Dan340	2.23473	Cu
Dan360	2.21344	Cu
Dan4245	2.24462	Cu
Dan598	2.28212	Cu
Dan599	2.2227	Cu
Dan9046	2.24534	Cu
DE.EX	2.25658	Cu
DH29	2.25586	Cu
DH3732	2.24425	Cu
Dong237	2.20219	Cu
Dong46	2.23785	Cu
DSB	2.25023	Cu
EN25	2.26636	Cu
ES40	2.23342	Cu
FCD0602	2.23415	Cu
GEMS1	2.21185	Cu
GEMS10	2.19329	Cu
GEMS11	2.24275	Cu
GEMS13	2.21127	Cu
GEMS14	2.23275	Cu
GEMS15	2.23999	Cu
GEMS16	2.21548	Cu
GEMS17	2.20267	Cu
GEMS18	2.29558	Cu
GEMS19	2.22389	Cu
GEMS2	2.20109	Cu
GEMS20	2.2666	Cu
GEMS21	2.24674	Cu
GEMS23	2.28981	Cu
GEMS24	2.23529	Cu
GEMS25	2.23736	Cu
GEMS27	2.27668	Cu
GEMS28	2.2995	Cu
GEMS29	2.21588	Cu
GEMS3	2.27815	Cu
GEMS30	2.23297	Cu
GEMS31	2.26997	Cu
GEMS32	2.31593	Cu
GEMS33	2.25037	Cu
GEMS35	2.21545	Cu
GEMS36	2.22653	Cu
GEMS37	2.21573	Cu
GEMS39	2.20449	Cu
GEMS4	2.25752	Cu
GEMS40	2.20856	Cu
GEMS41	2.21181	Cu
GEMS42	2.19978	Cu
GEMS43	2.30955	Cu
GEMS44	2.2564	Cu
GEMS45	2.26346	Cu
GEMS47	2.25306	Cu
GEMS48	2.21571	Cu
GEMS5	2.19991	Cu
GEMS50	2.20778	Cu
GEMS51	2.21357	Cu
GEMS52	2.2736	Cu
GEMS53	2.22124	Cu
GEMS54	2.24696	Cu
GEMS55	2.25305	Cu
GEMS56	2.22613	Cu
GEMS57	2.26268	Cu
GEMS58	2.25755	Cu
GEMS59	2.2336	Cu
GEMS6	2.26545	Cu
GEMS61	2.25855	Cu
GEMS62	2.19759	Cu
GEMS63	2.22243	Cu
GEMS64	2.21568	Cu
GEMS65	2.26604	Cu
GEMS66	2.26002	Cu
GEMS9	2.21174	Cu
Gy1032	2.25602	Cu
Gy220	2.24831	Cu
Gy237	2.21574	Cu
Gy386	2.21725	Cu
GY386B	2.22151	Cu
Gy462	2.26071	Cu
H21	2.21442	Cu
HB	2.249	Cu
HTH-17	2.22615	Cu
Hua83-2	2.22412	Cu
HuangC	2.19547	Cu
Huangzaosi	2.31405	Cu
HYS	2.25114	Cu
IRF291	2.23445	Cu
IRF314	2.24756	Cu
J4112	2.31	Cu
JH59	2.18619	Cu
JH96C	2.19169	Cu
Ji412	2.26734	Cu
Ji53	2.24689	Cu
Ji63	2.21204	Cu
Ji81162	2.25422	Cu
Ji842	2.24814	Cu
Ji846	2.23219	Cu
Ji853	2.27077	Cu
Jiao51	2.24593	Cu
JY01	2.29576	Cu
K10	2.23565	Cu
K12	2.23039	Cu
K22	2.25229	Cu
L3180	2.22241	Cu
LG001	2.30423	Cu
Liao138	2.27741	Cu
Liao159	2.21667	Cu
Liao5114	2.23369	Cu
Liao5262	2.22114	Cu
Liao5263	2.31065	Cu
LK11	2.20255	Cu
Lv28	2.21637	Cu
Lx9801	2.23583	Cu
LXN	2.26088	Cu
LY042	2.25636	Cu
M153	2.2912	Cu
M165	2.28321	Cu
M97	2.23578	Cu
MN	2.25771	Cu
MO113	2.23334	Cu
MO17	2.26345	Cu
Mo17	2.24978	Cu
Nan21-3	2.19925	Cu
NMJT	2.27496	Cu
P138	2.24434	Cu
P178	2.24794	Cu
Q1261	2.25687	Cu
Qi205	2.22178	Cu
Qi318	2.21652	Cu
Qi319	2.2565	Cu
R08	2.27187	Cu
R15	2.2282	Cu
R15X1141	2.21173	Cu
Ry684	2.22831	Cu
Ry697	2.24615	Cu
Ry729	2.24561	Cu
S22	2.2575	Cu
SC55	2.22654	Cu
Shen137	2.23071	Cu
Shen5003	2.21428	Cu
Si273	2.23634	Cu
Si444	2.22823	Cu
Si446	2.20344	Cu
SK	2.27936	Cu
SW1611	2.23999	Cu
SW92E114	2.26295	Cu
Sy1032	2.2736	Cu
Sy1035	2.2305	Cu
Sy1039	2.23347	Cu
Sy1052	2.2235	Cu
Sy1077	2.23814	Cu
Sy1128	2.2578	Cu
Sy3073	2.26519	Cu
Sy999	2.25696	Cu
Tian77	2.22918	Cu
Tie7922	2.22847	Cu
TT16	2.22346	Cu
TX5	2.26855	Cu
TY1	2.19815	Cu
TY10	2.24458	Cu
TY11	2.27678	Cu
TY2	2.22488	Cu
TY3	2.23371	Cu
TY4	2.28421	Cu
TY5	2.20181	Cu
TY6	2.24304	Cu
TY7	2.25242	Cu
TY8	2.22053	Cu
TY9	2.26014	Cu
U8112	2.25287	Cu
W138	2.23656	Cu
WH413	2.20558	Cu
WMR	2.22823	Cu
Wu109	2.30426	Cu
X178	2.27746	Cu
Xun971	2.28586	Cu
XZ698	2.29222	Cu
Yan414	2.22233	Cu
Ye107	2.24761	Cu
Ye478	2.20491	Cu
Ye488	2.30837	Cu
Ye515	2.305	Cu
Ye52106	2.25889	Cu
Yu12	2.23561	Cu
Yu374	2.2907	Cu
Yu87-1	2.24946	Cu
Z2018F	2.29495	Cu
ZaC546	2.31577	Cu
ZB648	2.24916	Cu
Zheng22	2.22913	Cu
Zheng28	2.28729	Cu
Zheng29	2.24623	Cu
Zheng30	2.22196	Cu
Zheng32	2.33193	Cu
Zheng35	2.24803	Cu
Zheng58	2.24661	Cu
Zheng653	2.18119	Cu
Zhi41	2.3288	Cu
Zhong69	2.25704	Cu
Zi330	2.22194	Cu
Zong31	2.24687	Cu
ZZ01	2.27064	Cu
ZZ03	2.21929	Cu

## Sheet: Mn
id	X.Intercept.
150	6.99668	Mn
177	6.92642	Mn
238	7.36864	Mn
268	8.28552	Mn
501	6.83914	Mn
812	7.11845	Mn
832	7.83497	Mn
1323	6.93165	Mn
1462	7.55287	Mn
3411	6.58125	Mn
4019	6.61542	Mn
5213	7.78557	Mn
5237	6.60445	Mn
5311	9.20974	Mn
7327	6.8835	Mn
7381	7.17484	Mn
8902	7.20253	Mn
9642	8.05239	Mn
9782	7.94564	Mn
81162	7.71229	Mn
526018	8.03459	Mn
04K5672	7.69522	Mn
04K5686	11.2259	Mn
04K5702	9.18769	Mn
05W002	7.71765	Mn
05WN230	6.61922	Mn
07KS4	6.8444	Mn
18-599	6.87907	Mn
303WX	8.35005	Mn
384-2	6.93549	Mn
4F1	7.93372	Mn
835a	7.04439	Mn
835b	6.81797	Mn
975-12	7.51136	Mn
A619	7.47139	Mn
B11	7.32882	Mn
B110	7.39967	Mn
B111	7.95147	Mn
B113	7.73696	Mn
B114	7.45356	Mn
B151	6.88328	Mn
B73	6.65985	Mn
B77	9.36562	Mn
BEM	7.58248	Mn
BGY	7.55612	Mn
BS16	7.13379	Mn
BT1	7.33238	Mn
By4839	9.14238	Mn
By4944	7.13401	Mn
By4960	7.74453	Mn
By804	7.06463	Mn
By807	7.82522	Mn
By809	7.28215	Mn
By815	6.90117	Mn
By843	7.68556	Mn
By855	6.79583	Mn
C8605	8.0179	Mn
CA339	7.07282	Mn
CF3	6.89263	Mn
Chang7-2	7.31009	Mn
Cheng698	7.03938	Mn
chuan48-2	7.77124	Mn
CI7	9.21681	Mn
CIMBL1	7.87797	Mn
CIMBL10	8.47857	Mn
CIMBL101	8.2524	Mn
CIMBL104	8.1518	Mn
CIMBL105	7.44277	Mn
CIMBL106	8.81182	Mn
CIMBL107	7.15739	Mn
CIMBL108	10.1582	Mn
CIMBL109	7.54848	Mn
CIMBL11	8.48895	Mn
CIMBL110	6.88901	Mn
CIMBL111	9.12548	Mn
CIMBL112	7.44258	Mn
CIMBL113	7.68874	Mn
CIMBL114	7.69983	Mn
CIMBL115	7.32258	Mn
CIMBL116	7.92248	Mn
CIMBL117	9.73251	Mn
CIMBL118	6.54671	Mn
CIMBL119	8.60827	Mn
CIMBL12	8.11257	Mn
CIMBL120	7.31161	Mn
CIMBL121	7.66597	Mn
CIMBL122	7.01582	Mn
CIMBL124	7.96721	Mn
CIMBL125	8.97309	Mn
CIMBL126	9.7299	Mn
CIMBL127	6.50648	Mn
CIMBL128	7.49201	Mn
CIMBL129	7.60633	Mn
CIMBL13	8.17984	Mn
CIMBL130	7.19367	Mn
CIMBL131	7.45758	Mn
CIMBL133	9.28089	Mn
CIMBL135	9.54206	Mn
CIMBL136	8.91143	Mn
CIMBL137	8.11959	Mn
CIMBL138	8.91922	Mn
CIMBL139	7.34072	Mn
CIMBL140	8.71903	Mn
CIMBL141	7.46294	Mn
CIMBL142	10.0222	Mn
CIMBL143	6.76907	Mn
CIMBL144	6.71013	Mn
CIMBL145	8.18359	Mn
CIMBL146	8.48912	Mn
CIMBL147	7.60821	Mn
CIMBL148	7.41272	Mn
CIMBL150	7.70553	Mn
CIMBL151	8.03631	Mn
CIMBL152	7.69297	Mn
CIMBL153	9.34713	Mn
CIMBL154	8.74166	Mn
CIMBL155	9.6666	Mn
CIMBL157	8.74876	Mn
CIMBL16	8.41372	Mn
CIMBL17	7.7146	Mn
CIMBL18	7.52757	Mn
CIMBL19	7.76077	Mn
CIMBL2	8.23768	Mn
CIMBL20	7.7757	Mn
CIMBL21	6.95657	Mn
CIMBL22	8.22661	Mn
CIMBL23	7.25324	Mn
CIMBL24	7.22822	Mn
CIMBL25	6.9352	Mn
CIMBL26	6.82386	Mn
CIMBL27	6.36451	Mn
CIMBL28	7.85998	Mn
CIMBL29	9.02782	Mn
CIMBL3	9.70532	Mn
CIMBL30	8.37374	Mn
CIMBL31	8.20516	Mn
CIMBL32	7.32929	Mn
CIMBL33	8.07878	Mn
CIMBL34	10.0132	Mn
CIMBL36	7.45698	Mn
CIMBL37	6.69606	Mn
CIMBL38	8.43705	Mn
CIMBL39	6.95406	Mn
CIMBL4	7.75802	Mn
CIMBL40	7.1595	Mn
CIMBL41	9.35466	Mn
CIMBL42	7.97427	Mn
CIMBL43	8.97762	Mn
CIMBL44	7.14651	Mn
CIMBL45	7.44225	Mn
CIMBL46	7.20538	Mn
CIMBL47	8.52022	Mn
CIMBL48	6.77702	Mn
CIMBL49	7.54501	Mn
CIMBL5	7.34762	Mn
CIMBL51	7.31147	Mn
CIMBL52	9.21907	Mn
CIMBL53	9.42169	Mn
CIMBL54	7.10501	Mn
CIMBL55	7.76128	Mn
CIMBL56	7.3636	Mn
CIMBL57	6.98404	Mn
CIMBL58	10.3985	Mn
CIMBL59	7.20772	Mn
CIMBL60	7.46852	Mn
CIMBL61	7.99748	Mn
CIMBL62	8.18886	Mn
CIMBL63	9.50177	Mn
CIMBL65	6.80347	Mn
CIMBL66	7.91007	Mn
CIMBL67	8.87117	Mn
CIMBL68	9.97282	Mn
CIMBL69	8.36129	Mn
CIMBL7	6.49008	Mn
CIMBL70	7.54541	Mn
CIMBL71	7.01483	Mn
CIMBL72	8.7562	Mn
CIMBL73	7.54994	Mn
CIMBL74	7.1211	Mn
CIMBL75	7.66909	Mn
CIMBL76	8.8613	Mn
CIMBL77	7.37826	Mn
CIMBL78	8.19873	Mn
CIMBL79	9.54345	Mn
CIMBL8	7.83538	Mn
CIMBL80	7.64272	Mn
CIMBL81	6.6608	Mn
CIMBL82	7.618	Mn
CIMBL83	7.8307	Mn
CIMBL85	7.61543	Mn
CIMBL86	8.8284	Mn
CIMBL87	7.77472	Mn
CIMBL88	6.97616	Mn
CIMBL89	7.44066	Mn
CIMBL9	7.09534	Mn
CIMBL90	7.04188	Mn
CIMBL91	11.2174	Mn
CIMBL92	8.17041	Mn
CIMBL93	8.57049	Mn
CIMBL94	7.46326	Mn
CIMBL95	8.00807	Mn
CIMBL96	8.36984	Mn
CIMBL97	7.52213	Mn
CIMBL98	10.6687	Mn
CIMBL99	6.21994	Mn
CML113	10.2664	Mn
CML114	9.54993	Mn
CML115	9.21448	Mn
CML116	7.50195	Mn
CML118	7.19764	Mn
CML121	6.85417	Mn
CML122	7.7951	Mn
CML130	6.42985	Mn
CML134	7.07013	Mn
CML139	8.21005	Mn
CML162	7.83537	Mn
CML163	6.5285	Mn
CML165	7.72042	Mn
CML166	6.31953	Mn
CML168	8.76213	Mn
CML169	7.50744	Mn
CML170	8.42706	Mn
CML171	7.29639	Mn
CML172	8.33252	Mn
CML189	8.1571	Mn
CML191	9.02989	Mn
CML192	8.58526	Mn
CML20	8.33139	Mn
CML223	6.63817	Mn
CML225	8.08153	Mn
CML226	8.28772	Mn
CML228	7.52735	Mn
CML26	7.9966	Mn
CML27	7.87655	Mn
CML28	8.59216	Mn
CML282	8.03792	Mn
CML285	6.21375	Mn
CML286	6.74237	Mn
CML287	8.97093	Mn
CML289	8.56965	Mn
CML29	9.12865	Mn
CML290	8.20738	Mn
CML298	7.54042	Mn
CML304	9.73581	Mn
CML307	6.9893	Mn
CML31	8.76659	Mn
CML32	7.58981	Mn
CML323	7.39939	Mn
CML324	10.865	Mn
CML325	11.5878	Mn
CML326	9.19894	Mn
CML327	7.80567	Mn
CML360	8.72025	Mn
CML361	7.83052	Mn
CML364	8.99026	Mn
CML40	7.3028	Mn
CML408	7.66823	Mn
CML411	7.29088	Mn
CML415	9.00994	Mn
CML422	7.84078	Mn
CML423	6.96819	Mn
CML426	7.97056	Mn
CML430	6.9066	Mn
CML431	6.30761	Mn
CML432	8.52749	Mn
CML433	6.97704	Mn
CML451	8.97007	Mn
CML454	7.17173	Mn
CML465	6.91071	Mn
CML468	7.22552	Mn
CML470	8.6884	Mn
CML473	7.80552	Mn
CML479	6.74247	Mn
CML480	8.45471	Mn
CML486	8.75475	Mn
CML493	8.94489	Mn
CML496	6.84525	Mn
CML497	7.2447	Mn
CML50	6.46834	Mn
CML51	6.69895	Mn
CML69	8.40278	Mn
CN962	8.0083	Mn
CY72	7.37839	Mn
D047	8.56052	Mn
D863F	8.25692	Mn
Dan3130	7.9423	Mn
Dan340	6.6678	Mn
Dan360	7.18189	Mn
Dan4245	6.95368	Mn
Dan598	7.11676	Mn
Dan599	7.29007	Mn
Dan9046	7.81505	Mn
DE.EX	6.60601	Mn
DH29	8.78728	Mn
DH3732	7.63496	Mn
Dong237	8.25784	Mn
Dong46	8.6671	Mn
DSB	8.87845	Mn
EN25	7.29702	Mn
ES40	7.9341	Mn
FCD0602	7.31468	Mn
GEMS1	7.1244	Mn
GEMS10	7.52341	Mn
GEMS11	8.79545	Mn
GEMS13	7.20828	Mn
GEMS14	7.94148	Mn
GEMS15	9.46414	Mn
GEMS16	7.58854	Mn
GEMS17	6.72425	Mn
GEMS18	8.38383	Mn
GEMS19	7.57341	Mn
GEMS2	6.78974	Mn
GEMS20	7.52902	Mn
GEMS21	8.49261	Mn
GEMS23	7.10109	Mn
GEMS24	7.95913	Mn
GEMS25	7.0653	Mn
GEMS27	8.00033	Mn
GEMS28	6.43698	Mn
GEMS29	7.47599	Mn
GEMS3	8.45734	Mn
GEMS30	6.65384	Mn
GEMS31	9.34906	Mn
GEMS32	8.23144	Mn
GEMS33	7.91578	Mn
GEMS35	6.7961	Mn
GEMS36	8.12797	Mn
GEMS37	7.30733	Mn
GEMS39	7.73756	Mn
GEMS4	7.07625	Mn
GEMS40	7.02911	Mn
GEMS41	7.37271	Mn
GEMS42	6.61165	Mn
GEMS43	7.49164	Mn
GEMS44	8.42417	Mn
GEMS45	6.72971	Mn
GEMS47	6.98382	Mn
GEMS48	6.76795	Mn
GEMS5	6.98079	Mn
GEMS50	7.04419	Mn
GEMS51	7.39497	Mn
GEMS52	7.69681	Mn
GEMS53	7.38595	Mn
GEMS54	7.51006	Mn
GEMS55	7.561	Mn
GEMS56	7.58739	Mn
GEMS57	7.91241	Mn
GEMS58	9.0698	Mn
GEMS59	5.96958	Mn
GEMS6	9.89648	Mn
GEMS61	8.38627	Mn
GEMS62	8.32255	Mn
GEMS63	7.3378	Mn
GEMS64	7.38704	Mn
GEMS65	8.14453	Mn
GEMS66	6.58082	Mn
GEMS9	8.53484	Mn
Gy1032	7.44436	Mn
Gy220	7.91947	Mn
Gy237	7.51811	Mn
Gy386	7.724	Mn
GY386B	7.32843	Mn
Gy462	8.21354	Mn
H21	7.44303	Mn
HB	8.01151	Mn
HTH-17	7.19851	Mn
Hua83-2	7.83119	Mn
HuangC	8.00187	Mn
Huangzaosi	8.26651	Mn
HYS	7.83232	Mn
IRF291	8.08352	Mn
IRF314	6.6148	Mn
J4112	7.89854	Mn
JH59	7.35103	Mn
JH96C	7.42077	Mn
Ji412	7.36861	Mn
Ji53	6.55567	Mn
Ji63	9.16345	Mn
Ji81162	6.35136	Mn
Ji842	6.89441	Mn
Ji846	7.50627	Mn
Ji853	8.75311	Mn
Jiao51	8.87982	Mn
JY01	8.02027	Mn
K10	7.13345	Mn
K12	7.51605	Mn
K22	6.7078	Mn
L3180	7.42986	Mn
LG001	6.69916	Mn
Liao138	7.70137	Mn
Liao159	7.56042	Mn
Liao5114	8.05299	Mn
Liao5262	7.25262	Mn
Liao5263	6.81543	Mn
LK11	7.76979	Mn
Lv28	8.59109	Mn
Lx9801	7.19081	Mn
LXN	7.26583	Mn
LY	7.45336	Mn
LY042	7.70858	Mn
M153	7.66008	Mn
M165	6.43992	Mn
M97	7.69966	Mn
MN	10.6536	Mn
MO113	7.7734	Mn
Mo17	7.44346	Mn
MO17	7.3883	Mn
Nan21-3	7.0354	Mn
NMJT	8.79342	Mn
P138	7.23283	Mn
P178	7.11309	Mn
Q1261	7.42401	Mn
Qi205	9.04503	Mn
Qi318	7.1524	Mn
Qi319	6.89699	Mn
R08	7.42723	Mn
R15	8.81404	Mn
R15X1141	7.29765	Mn
Ry684	7.44902	Mn
Ry697	7.61089	Mn
Ry729	6.72796	Mn
S22	7.41136	Mn
SC55	7.92292	Mn
Shen137	7.91867	Mn
Shen5003	7.51157	Mn
Si273	5.91869	Mn
Si444	6.79259	Mn
Si446	7.52173	Mn
SK	9.90286	Mn
SW1611	7.74229	Mn
SW92E114	9.57212	Mn
Sy1032	6.82736	Mn
Sy1035	9.08637	Mn
Sy1039	7.11341	Mn
Sy1052	7.70724	Mn
Sy1077	7.62418	Mn
Sy1128	7.22242	Mn
Sy3073	8.45809	Mn
Sy999	7.76284	Mn
Tian77	7.20387	Mn
Tie7922	6.71197	Mn
TT16	6.86327	Mn
TX5	8.8977	Mn
TY1	7.69982	Mn
TY10	7.73106	Mn
TY11	7.7758	Mn
TY2	8.65552	Mn
TY3	8.29348	Mn
TY4	7.30776	Mn
TY5	8.11818	Mn
TY6	10.1361	Mn
TY7	7.53242	Mn
TY8	8.14222	Mn
TY9	8.13535	Mn
U8112	6.18984	Mn
W138	7.81312	Mn
WH413	7.10624	Mn
WMR	7.81372	Mn
Wu109	7.47672	Mn
X178	7.26673	Mn
Xun971	7.13336	Mn
XZ698	7.70881	Mn
Yan414	7.41986	Mn
Ye107	7.57039	Mn
Ye478	7.00371	Mn
Ye488	9.52214	Mn
Ye515	7.54477	Mn
Ye52106	7.92525	Mn
Ye8001	7.98938	Mn
Yu12	8.10106	Mn
Yu374	6.74713	Mn
Yu87-1	7.19185	Mn
Z2018F	7.63981	Mn
ZaC546	9.12038	Mn
ZB648	7.14732	Mn
Zheng22	7.79936	Mn
Zheng28	7.06738	Mn
Zheng29	6.80554	Mn
Zheng30	6.99518	Mn
Zheng32	6.55893	Mn
Zheng35	6.60411	Mn
Zheng58	6.39188	Mn
Zheng653	6.82806	Mn
Zhi41	7.20703	Mn
Zhong69	8.09962	Mn
Zi330	6.88613	Mn
Zong31	7.93986	Mn
ZZ01	7.80332	Mn
ZZ03	7.16157	Mn

## Sheet: As
id	X.Intercept.
150	0.0506459	As
177	0.0507881	As
238	0.0529561	As
268	0.0518681	As
501	0.0510278	As
812	0.0508728	As
832	0.0522576	As
1323	0.0522815	As
1462	0.0509679	As
3411	0.0509962	As
4019	0.0524364	As
5213	0.053116	As
5237	0.0522503	As
5311	0.0540037	As
7327	0.0583815	As
7381	0.050963	As
8902	0.0522303	As
9642	0.0507379	As
9782	0.0515881	As
81162	0.0507226	As
526018	0.0544442	As
04K5672	0.0522754	As
04K5686	0.0522616	As
04K5702	0.0522135	As
05W002	0.0512222	As
05WN230	0.0523219	As
07KS4	0.0525936	As
18-599	0.0508304	As
303WX	0.0515697	As
384-2	0.0522759	As
4F1	0.0507432	As
835a	0.0505191	As
835b	0.0505632	As
975-12	0.0507568	As
A619	0.0510662	As
B11	0.0525148	As
B110	0.0514031	As
B111	0.0509511	As
B113	0.0509061	As
B114	0.0522731	As
B151	0.0508705	As
B73	0.0507221	As
B77	0.0522704	As
BEM	0.0507446	As
BGY	0.0521074	As
BS16	0.0509945	As
BT1	0.053006	As
By4839	0.0523243	As
By4944	0.0537899	As
By4960	0.0510577	As
By804	0.0524953	As
By807	0.0510932	As
By809	0.0508087	As
By815	0.0524542	As
By843	0.0521778	As
By855	0.0511185	As
C8605	0.0522786	As
CA339	0.0504852	As
CF3	0.052499	As
Chang7-2	0.0507459	As
Cheng698	0.0527184	As
chuan48-2	0.0522553	As
CI7	0.0507575	As
CIMBL1	0.0524842	As
CIMBL10	0.0513378	As
CIMBL101	0.0522352	As
CIMBL104	0.0529887	As
CIMBL105	0.0521847	As
CIMBL106	0.0510416	As
CIMBL107	0.0545234	As
CIMBL108	0.0666872	As
CIMBL109	0.0536728	As
CIMBL11	0.0521396	As
CIMBL110	0.0525765	As
CIMBL111	0.055589	As
CIMBL112	0.051969	As
CIMBL113	0.0697819	As
CIMBL114	0.0523983	As
CIMBL115	0.052424	As
CIMBL116	0.0527898	As
CIMBL117	0.0518589	As
CIMBL118	0.0524635	As
CIMBL119	0.0526391	As
CIMBL12	0.0522969	As
CIMBL120	0.0528926	As
CIMBL121	0.052417	As
CIMBL122	0.0521878	As
CIMBL124	0.0519933	As
CIMBL125	0.0540092	As
CIMBL126	0.0521752	As
CIMBL127	0.0520332	As
CIMBL128	0.051372	As
CIMBL129	0.0519288	As
CIMBL13	0.0514403	As
CIMBL130	0.0511281	As
CIMBL131	0.0510608	As
CIMBL133	0.0662376	As
CIMBL135	0.0523342	As
CIMBL136	0.0532569	As
CIMBL137	0.0518349	As
CIMBL138	0.0520973	As
CIMBL139	0.0524152	As
CIMBL140	0.0521236	As
CIMBL141	0.0543683	As
CIMBL142	0.0523761	As
CIMBL143	0.0522878	As
CIMBL144	0.0517964	As
CIMBL145	0.0519377	As
CIMBL146	0.0519654	As
CIMBL147	0.0566785	As
CIMBL148	0.0518008	As
CIMBL150	0.0523464	As
CIMBL151	0.0539478	As
CIMBL152	0.0523906	As
CIMBL153	0.0538101	As
CIMBL154	0.0525151	As
CIMBL155	0.0514823	As
CIMBL157	0.0519351	As
CIMBL16	0.0523821	As
CIMBL17	0.0520288	As
CIMBL18	0.052108	As
CIMBL19	0.053565	As
CIMBL2	0.0523899	As
CIMBL20	0.0522593	As
CIMBL21	0.0522757	As
CIMBL22	0.05217	As
CIMBL23	0.0520317	As
CIMBL24	0.0516793	As
CIMBL25	0.0511261	As
CIMBL26	0.0521702	As
CIMBL27	0.0522358	As
CIMBL28	0.0581317	As
CIMBL29	0.0522074	As
CIMBL3	0.0522829	As
CIMBL30	0.0512372	As
CIMBL32	0.051555	As
CIMBL33	0.0519695	As
CIMBL34	0.0542971	As
CIMBL36	0.0510345	As
CIMBL37	0.0525043	As
CIMBL38	0.0522597	As
CIMBL39	0.0519624	As
CIMBL4	0.052127	As
CIMBL40	0.0522921	As
CIMBL41	0.0631128	As
CIMBL42	0.0527914	As
CIMBL43	0.0529664	As
CIMBL44	0.0511509	As
CIMBL45	0.0521657	As
CIMBL46	0.0524902	As
CIMBL47	0.0553218	As
CIMBL48	0.0546518	As
CIMBL49	0.0522895	As
CIMBL51	0.0544676	As
CIMBL52	0.052348	As
CIMBL53	0.0521855	As
CIMBL54	0.0522872	As
CIMBL55	0.0527202	As
CIMBL56	0.0549122	As
CIMBL57	0.0521053	As
CIMBL58	0.0537564	As
CIMBL59	0.0511849	As
CIMBL60	0.0523648	As
CIMBL61	0.0535812	As
CIMBL62	0.0524756	As
CIMBL63	0.0527419	As
CIMBL65	0.0533281	As
CIMBL66	0.0510371	As
CIMBL67	0.0521894	As
CIMBL68	0.0520918	As
CIMBL69	0.0522103	As
CIMBL7	0.0511442	As
CIMBL70	0.0523882	As
CIMBL71	0.0532095	As
CIMBL72	0.052323	As
CIMBL73	0.0539226	As
CIMBL74	0.0526192	As
CIMBL75	0.0522002	As
CIMBL76	0.0524077	As
CIMBL77	0.0511672	As
CIMBL78	0.0525883	As
CIMBL79	0.0530549	As
CIMBL8	0.0510228	As
CIMBL80	0.0511794	As
CIMBL81	0.0559835	As
CIMBL82	0.0520075	As
CIMBL83	0.0549141	As
CIMBL85	0.0526627	As
CIMBL86	0.0524072	As
CIMBL87	0.0511412	As
CIMBL88	0.0527476	As
CIMBL89	0.0525593	As
CIMBL9	0.0529155	As
CIMBL90	0.05359	As
CIMBL91	0.0521526	As
CIMBL92	0.0531704	As
CIMBL93	0.0551159	As
CIMBL94	0.0561893	As
CIMBL95	0.0525841	As
CIMBL96	0.0535323	As
CIMBL97	0.0519001	As
CIMBL98	0.0525819	As
CIMBL99	0.0521419	As
CML113	0.0621747	As
CML114	0.0512788	As
CML115	0.0523491	As
CML116	0.0524257	As
CML118	0.0527841	As
CML121	0.052617	As
CML122	0.0524192	As
CML130	0.0519627	As
CML134	0.0521936	As
CML139	0.0521846	As
CML162	0.0551697	As
CML163	0.0553383	As
CML165	0.0522015	As
CML166	0.051806	As
CML168	0.0522092	As
CML169	0.0527517	As
CML170	0.0522589	As
CML171	0.0510046	As
CML172	0.0517854	As
CML189	0.0524948	As
CML191	0.0512462	As
CML192	0.0524057	As
CML20	0.0519481	As
CML223	0.0551213	As
CML225	0.0518977	As
CML226	0.051642	As
CML228	0.0520074	As
CML26	0.0522146	As
CML27	0.0523619	As
CML28	0.0522879	As
CML282	0.0526731	As
CML285	0.0537216	As
CML286	0.052334	As
CML287	0.0528803	As
CML289	0.0519539	As
CML29	0.0539937	As
CML290	0.0518703	As
CML298	0.0536266	As
CML304	0.0518867	As
CML307	0.0537471	As
CML31	0.0526107	As
CML32	0.0524735	As
CML323	0.0517605	As
CML324	0.0532861	As
CML325	0.0509483	As
CML326	0.0541159	As
CML327	0.0520627	As
CML360	0.0522128	As
CML361	0.0528179	As
CML364	0.05206	As
CML40	0.0518748	As
CML408	0.0554429	As
CML411	0.0537459	As
CML415	0.0529296	As
CML422	0.0525558	As
CML423	0.0520991	As
CML426	0.0510929	As
CML430	0.0509162	As
CML431	0.0524051	As
CML432	0.0539106	As
CML433	0.051799	As
CML451	0.0512538	As
CML454	0.0524195	As
CML465	0.0524156	As
CML468	0.0541353	As
CML470	0.0537413	As
CML473	0.0525404	As
CML479	0.0528052	As
CML480	0.0513215	As
CML486	0.0524847	As
CML493	0.0525113	As
CML496	0.0512356	As
CML497	0.0516735	As
CML50	0.0533213	As
CML51	0.052429	As
CML69	0.0525157	As
CN962	0.0512363	As
CY72	0.0508476	As
D047	0.0516675	As
D863F	0.0511005	As
Dan3130	0.0507035	As
Dan340	0.0490033	As
Dan360	0.0510985	As
Dan4245	0.0509707	As
Dan598	0.0510941	As
Dan599	0.0519069	As
Dan9046	0.0521802	As
DE.EX	0.0507128	As
DH29	0.0512193	As
DH3732	0.0506883	As
Dong237	0.052891	As
Dong46	0.0521687	As
DSB	0.0510796	As
EN25	0.0515794	As
ES40	0.0505456	As
FCD0602	0.0531089	As
GEMS1	0.0677714	As
GEMS10	0.0532353	As
GEMS11	0.0519989	As
GEMS13	0.0511713	As
GEMS14	0.0533805	As
GEMS15	0.0512106	As
GEMS16	0.052209	As
GEMS17	0.0507257	As
GEMS18	0.0507493	As
GEMS19	0.0511767	As
GEMS2	0.0521874	As
GEMS20	0.0534038	As
GEMS21	0.0508926	As
GEMS23	0.0532158	As
GEMS24	0.0506324	As
GEMS25	0.0507699	As
GEMS27	0.0508765	As
GEMS28	0.0579817	As
GEMS29	0.0522268	As
GEMS3	0.0532077	As
GEMS30	0.0521845	As
GEMS31	0.0505182	As
GEMS32	0.0528513	As
GEMS33	0.0528624	As
GEMS35	0.050769	As
GEMS36	0.0522038	As
GEMS37	0.0512304	As
GEMS39	0.0521404	As
GEMS4	0.0507275	As
GEMS40	0.0524421	As
GEMS41	0.0506359	As
GEMS42	0.053534	As
GEMS43	0.0532104	As
GEMS44	0.0507032	As
GEMS45	0.0510641	As
GEMS47	0.0537065	As
GEMS48	0.0528824	As
GEMS5	0.0520722	As
GEMS50	0.050838	As
GEMS51	0.0521972	As
GEMS52	0.052339	As
GEMS53	0.0509784	As
GEMS54	0.0523024	As
GEMS55	0.0529276	As
GEMS56	0.054942	As
GEMS57	0.0508441	As
GEMS58	0.0523695	As
GEMS59	0.0532662	As
GEMS6	0.0508326	As
GEMS61	0.0518298	As
GEMS62	0.0509608	As
GEMS63	0.0509343	As
GEMS64	0.052164	As
GEMS65	0.0518441	As
GEMS66	0.0517039	As
GEMS9	0.0524113	As
Gy1032	0.0509064	As
Gy220	0.0523043	As
Gy237	0.0508819	As
Gy386	0.0508883	As
GY386B	0.0523075	As
Gy462	0.0511507	As
H21	0.0547794	As
HB	0.051019	As
HTH-17	0.0523667	As
Hua83-2	0.0507747	As
HuangC	0.0506667	As
Huangzaosi	0.050736	As
HYS	0.0530197	As
IRF291	0.0512415	As
IRF314	0.0508487	As
J4112	0.0508613	As
JH59	0.0528622	As
JH96C	0.0518529	As
Ji412	0.0513288	As
Ji53	0.0510643	As
Ji63	0.052037	As
Ji81162	0.0507527	As
Ji842	0.0519603	As
Ji846	0.0531134	As
Ji853	0.0509057	As
Jiao51	0.0510419	As
JY01	0.0510751	As
K10	0.0525685	As
K12	0.0522981	As
K22	0.0530307	As
L3180	0.0505478	As
LG001	0.0541267	As
Liao138	0.0508337	As
Liao159	0.0521261	As
Liao5114	0.051328	As
Liao5262	0.0509435	As
Liao5263	0.0560058	As
LK11	0.053	As
Lv28	0.0508488	As
Lx9801	0.0522779	As
LXN	0.0508736	As
LY	0.0535107	As
LY042	0.0522566	As
M153	0.0512642	As
M165	0.0522184	As
M97	0.0512571	As
MN	0.0513717	As
MO113	0.0524616	As
MO17	0.0522525	As
Mo17	0.0513372	As
Nan21-3	0.0524233	As
NMJT	0.0511448	As
P138	0.0514616	As
P178	0.052087	As
Q1261	0.0513088	As
Qi205	0.0521025	As
Qi318	0.051606	As
Qi319	0.0514042	As
R08	0.0522419	As
R15	0.0516499	As
R15X1141	0.0523946	As
Ry684	0.0508859	As
Ry697	0.0509719	As
Ry729	0.0508089	As
S22	0.0534985	As
SC55	0.0585907	As
Shen137	0.0537577	As
Shen5003	0.0508849	As
Si273	0.0530053	As
Si444	0.052079	As
Si446	0.0533535	As
SK	0.0522578	As
SW1611	0.05111	As
SW92E114	0.0506696	As
Sy1032	0.0533219	As
Sy1035	0.0522962	As
Sy1039	0.0510467	As
Sy1052	0.0506321	As
Sy1077	0.0521529	As
Sy1128	0.053522	As
Sy3073	0.0507548	As
Sy999	0.0507055	As
Tian77	0.0508837	As
Tie7922	0.0494042	As
TT16	0.0507916	As
TX5	0.0517641	As
TY1	0.0509753	As
TY10	0.0512613	As
TY11	0.0528235	As
TY2	0.051028	As
TY3	0.0506763	As
TY4	0.0508416	As
TY5	0.0521456	As
TY6	0.0510241	As
TY7	0.0505765	As
TY8	0.0505979	As
TY9	0.0521347	As
U8112	0.0508312	As
W138	0.0522777	As
WH413	0.0508648	As
WMR	0.0509229	As
Wu109	0.0521575	As
X178	0.0522563	As
Xun971	0.0506722	As
XZ698	0.0513148	As
Yan414	0.0522082	As
Ye107	0.0562599	As
Ye478	0.0505066	As
Ye488	0.0508087	As
Ye515	0.0509355	As
Ye52106	0.0547509	As
Ye8001	0.0519034	As
Yu12	0.0512798	As
Yu374	0.0521653	As
Yu87-1	0.0507235	As
Z2018F	0.0508051	As
ZaC546	0.0508531	As
ZB648	0.050996	As
Zheng22	0.0531424	As
Zheng28	0.0510894	As
Zheng29	0.0508553	As
Zheng30	0.0521491	As
Zheng32	0.0542959	As
Zheng35	0.0652401	As
Zheng58	0.0505455	As
Zheng653	0.0506128	As
Zhi41	0.0515208	As
Zhong69	0.0536863	As
Zi330	0.0511238	As
Zong31	0.052524	As
ZZ01	0.0533121	As
ZZ03	0.0522242	As

## Sheet: Cd
id	X.Intercept.
150	0.02413	Cd
177	0.0185137	Cd
238	0.00550251	Cd
268	0.0135349	Cd
501	0.0254522	Cd
812	0.0162608	Cd
832	0.00918613	Cd
1323	0.00623223	Cd
1462	0.0058658	Cd
3411	0.0105982	Cd
4019	0.00537121	Cd
5213	0.00503687	Cd
5237	0.0189342	Cd
5311	0.00567934	Cd
7327	0.00545732	Cd
7381	0.0185668	Cd
8902	0.0156903	Cd
9642	0.0154616	Cd
9782	0.0120155	Cd
81162	0.00422874	Cd
526018	0.0045058	Cd
04K5672	0.0166131	Cd
04K5686	0.00590101	Cd
04K5702	0.00597757	Cd
05W002	0.0051096	Cd
05WN230	0.00572607	Cd
07KS4	0.014814	Cd
18-599	0.0158793	Cd
303WX	0.00660052	Cd
384-2	0.00678238	Cd
4F1	0.0117718	Cd
835a	0.0226514	Cd
835b	0.0215912	Cd
975-12	0.023649	Cd
A619	0.00769636	Cd
B11	0.00652089	Cd
B110	0.00504355	Cd
B111	0.00696681	Cd
B113	0.00522705	Cd
B114	0.0183674	Cd
B151	0.00935503	Cd
B73	0.00491505	Cd
B77	0.00792293	Cd
BEM	0.0046479	Cd
BGY	0.00516894	Cd
BS16	0.0074533	Cd
BT1	0.00739768	Cd
By4839	0.0137788	Cd
By4944	0.00597957	Cd
By4960	0.00665297	Cd
By804	0.00608554	Cd
By807	0.00588856	Cd
By809	0.00486102	Cd
By815	0.0067647	Cd
By843	0.00613404	Cd
By855	0.00603793	Cd
C8605	0.0142843	Cd
CA339	0.00624824	Cd
CF3	0.00851398	Cd
Chang7-2	0.00547663	Cd
Cheng698	0.0112879	Cd
chuan48-2	0.00782007	Cd
CI7	0.00566076	Cd
CIMBL1	0.00530999	Cd
CIMBL10	0.00876281	Cd
CIMBL101	0.00704389	Cd
CIMBL104	0.00690633	Cd
CIMBL105	0.00532194	Cd
CIMBL106	0.0047457	Cd
CIMBL107	0.00717573	Cd
CIMBL109	0.00455483	Cd
CIMBL11	0.00579824	Cd
CIMBL110	0.00754609	Cd
CIMBL111	0.00771435	Cd
CIMBL112	0.00596704	Cd
CIMBL113	0.00550636	Cd
CIMBL114	0.00552954	Cd
CIMBL115	0.00552263	Cd
CIMBL116	0.00560812	Cd
CIMBL117	0.0088399	Cd
CIMBL118	0.00641854	Cd
CIMBL119	0.00642065	Cd
CIMBL12	0.0100772	Cd
CIMBL120	0.00574137	Cd
CIMBL121	0.00813236	Cd
CIMBL122	0.00479394	Cd
CIMBL124	0.00524595	Cd
CIMBL125	0.00656499	Cd
CIMBL126	0.00722716	Cd
CIMBL127	0.00460416	Cd
CIMBL128	0.0123333	Cd
CIMBL129	0.00662288	Cd
CIMBL13	0.00492945	Cd
CIMBL130	0.0102561	Cd
CIMBL131	0.005457	Cd
CIMBL133	0.00658398	Cd
CIMBL135	0.00797406	Cd
CIMBL136	0.00547832	Cd
CIMBL137	0.00545916	Cd
CIMBL138	0.00592347	Cd
CIMBL139	0.00667884	Cd
CIMBL140	0.00559182	Cd
CIMBL141	0.00939974	Cd
CIMBL142	0.00501947	Cd
CIMBL143	0.00654416	Cd
CIMBL144	0.00478745	Cd
CIMBL145	0.0078196	Cd
CIMBL146	0.00592495	Cd
CIMBL147	0.0234495	Cd
CIMBL148	0.00610995	Cd
CIMBL150	0.0108024	Cd
CIMBL151	0.00743581	Cd
CIMBL153	0.00811621	Cd
CIMBL154	0.00703229	Cd
CIMBL155	0.00881938	Cd
CIMBL157	0.00677426	Cd
CIMBL16	0.00646284	Cd
CIMBL17	0.00444306	Cd
CIMBL18	0.00524371	Cd
CIMBL19	0.00574937	Cd
CIMBL2	0.00588754	Cd
CIMBL20	0.00646456	Cd
CIMBL21	0.005422	Cd
CIMBL22	0.00755017	Cd
CIMBL23	0.0079356	Cd
CIMBL25	0.00744835	Cd
CIMBL26	0.00629905	Cd
CIMBL27	0.00620509	Cd
CIMBL28	0.00495909	Cd
CIMBL29	0.00671602	Cd
CIMBL3	0.00560537	Cd
CIMBL30	0.0121658	Cd
CIMBL32	0.0263195	Cd
CIMBL33	0.00464093	Cd
CIMBL34	0.00669114	Cd
CIMBL37	0.00606335	Cd
CIMBL38	0.0277968	Cd
CIMBL39	0.00540949	Cd
CIMBL4	0.00955006	Cd
CIMBL40	0.00514156	Cd
CIMBL41	0.00481806	Cd
CIMBL42	0.00577716	Cd
CIMBL43	0.00665601	Cd
CIMBL44	0.0139978	Cd
CIMBL45	0.00615031	Cd
CIMBL46	0.00606349	Cd
CIMBL47	0.0055188	Cd
CIMBL48	0.00828726	Cd
CIMBL49	0.00494425	Cd
CIMBL51	0.00689102	Cd
CIMBL52	0.00596771	Cd
CIMBL53	0.00528892	Cd
CIMBL54	0.00592055	Cd
CIMBL55	0.00814895	Cd
CIMBL56	0.00606377	Cd
CIMBL57	0.00540489	Cd
CIMBL58	0.00563111	Cd
CIMBL59	0.00497161	Cd
CIMBL60	0.00750176	Cd
CIMBL61	0.00584848	Cd
CIMBL62	0.00827668	Cd
CIMBL63	0.00970687	Cd
CIMBL65	0.00625018	Cd
CIMBL66	0.00520455	Cd
CIMBL67	0.00563052	Cd
CIMBL68	0.00621424	Cd
CIMBL69	0.00652262	Cd
CIMBL7	0.00687105	Cd
CIMBL70	0.00743919	Cd
CIMBL71	0.00472925	Cd
CIMBL72	0.00745169	Cd
CIMBL73	0.0103282	Cd
CIMBL74	0.00704336	Cd
CIMBL75	0.00572121	Cd
CIMBL76	0.00566465	Cd
CIMBL77	0.00488817	Cd
CIMBL78	0.00604444	Cd
CIMBL79	0.00682694	Cd
CIMBL8	0.00496138	Cd
CIMBL80	0.0061063	Cd
CIMBL81	0.00510993	Cd
CIMBL82	0.00899856	Cd
CIMBL85	0.0081173	Cd
CIMBL86	0.00847568	Cd
CIMBL87	0.00592003	Cd
CIMBL88	0.00639668	Cd
CIMBL89	0.00611176	Cd
CIMBL9	0.00518353	Cd
CIMBL90	0.0251281	Cd
CIMBL91	0.00501943	Cd
CIMBL92	0.00984417	Cd
CIMBL93	0.00635443	Cd
CIMBL94	0.016446	Cd
CIMBL95	0.00529236	Cd
CIMBL96	0.00568875	Cd
CIMBL97	0.00826451	Cd
CIMBL98	0.00837715	Cd
CIMBL99	0.00473541	Cd
CML113	0.00528437	Cd
CML114	0.00738722	Cd
CML115	0.0071643	Cd
CML116	0.00601673	Cd
CML118	0.0198551	Cd
CML121	0.00562728	Cd
CML122	0.0077027	Cd
CML130	0.0422814	Cd
CML134	0.0069602	Cd
CML139	0.00637703	Cd
CML162	0.00667012	Cd
CML163	0.00528307	Cd
CML165	0.0286085	Cd
CML166	0.00493949	Cd
CML168	0.0338086	Cd
CML169	0.0197274	Cd
CML170	0.0056477	Cd
CML171	0.00690625	Cd
CML172	0.0077394	Cd
CML189	0.00603343	Cd
CML191	0.00654288	Cd
CML192	0.00944878	Cd
CML20	0.00634427	Cd
CML223	0.00594297	Cd
CML225	0.00839131	Cd
CML226	0.00569253	Cd
CML228	0.00675088	Cd
CML26	0.00686088	Cd
CML27	0.00744148	Cd
CML28	0.00740242	Cd
CML282	0.00729483	Cd
CML285	0.00421264	Cd
CML286	0.0056823	Cd
CML287	0.0054515	Cd
CML289	0.0059575	Cd
CML29	0.00598118	Cd
CML290	0.00616793	Cd
CML298	0.00513607	Cd
CML304	0.0118397	Cd
CML307	0.00690488	Cd
CML31	0.0123905	Cd
CML32	0.00586686	Cd
CML323	0.00543917	Cd
CML324	0.00579361	Cd
CML325	0.00906038	Cd
CML326	0.00592809	Cd
CML327	0.00498209	Cd
CML360	0.00581232	Cd
CML361	0.0051401	Cd
CML364	0.00738711	Cd
CML40	0.00528679	Cd
CML408	0.00543205	Cd
CML411	0.00697324	Cd
CML415	0.00744567	Cd
CML422	0.00584019	Cd
CML423	0.00557473	Cd
CML426	0.00625297	Cd
CML430	0.00543255	Cd
CML431	0.0052162	Cd
CML432	0.0055576	Cd
CML433	0.00644135	Cd
CML451	0.00548409	Cd
CML454	0.00585226	Cd
CML465	0.00626392	Cd
CML468	0.00524173	Cd
CML470	0.00669523	Cd
CML473	0.00781579	Cd
CML479	0.00490306	Cd
CML480	0.00483482	Cd
CML486	0.00727557	Cd
CML493	0.00541165	Cd
CML496	0.00536527	Cd
CML497	0.00591001	Cd
CML50	0.00744898	Cd
CML51	0.00522111	Cd
CML69	0.00596336	Cd
CN962	0.00516344	Cd
CY72	0.0142332	Cd
D047	0.00557631	Cd
D863F	0.0253751	Cd
Dan3130	0.0251565	Cd
Dan340	0.00938204	Cd
Dan360	0.00834831	Cd
Dan4245	0.0049133	Cd
Dan598	0.00475916	Cd
Dan599	0.00486127	Cd
Dan9046	0.0234912	Cd
DE.EX	0.0325705	Cd
DH29	0.00543294	Cd
DH3732	0.00539178	Cd
Dong237	0.0156321	Cd
Dong46	0.00829205	Cd
DSB	0.00614493	Cd
EN25	0.00528357	Cd
ES40	0.00642334	Cd
FCD0602	0.0116035	Cd
GEMS1	0.00595189	Cd
GEMS10	0.0044478	Cd
GEMS11	0.00498392	Cd
GEMS13	0.0102036	Cd
GEMS14	0.00481222	Cd
GEMS15	0.00605319	Cd
GEMS16	0.00601988	Cd
GEMS17	0.00613761	Cd
GEMS18	0.00453967	Cd
GEMS19	0.00526686	Cd
GEMS2	0.00694045	Cd
GEMS20	0.00648812	Cd
GEMS21	0.00470358	Cd
GEMS23	0.00534404	Cd
GEMS24	0.00548909	Cd
GEMS25	0.00507814	Cd
GEMS27	0.00680993	Cd
GEMS28	0.00626412	Cd
GEMS29	0.00549782	Cd
GEMS3	0.0273448	Cd
GEMS30	0.00555746	Cd
GEMS31	0.00585041	Cd
GEMS32	0.012883	Cd
GEMS33	0.0329383	Cd
GEMS35	0.0182829	Cd
GEMS36	0.032848	Cd
GEMS37	0.0183086	Cd
GEMS39	0.00551233	Cd
GEMS4	0.00482237	Cd
GEMS40	0.00527315	Cd
GEMS41	0.00494877	Cd
GEMS42	0.00630746	Cd
GEMS43	0.024746	Cd
GEMS44	0.00787669	Cd
GEMS45	0.00570594	Cd
GEMS47	0.00960606	Cd
GEMS48	0.00936659	Cd
GEMS5	0.00555449	Cd
GEMS50	0.00929087	Cd
GEMS51	0.00522782	Cd
GEMS52	0.00547516	Cd
GEMS53	0.0054077	Cd
GEMS54	0.00736068	Cd
GEMS55	0.00666973	Cd
GEMS56	0.0127842	Cd
GEMS57	0.00412999	Cd
GEMS58	0.00828384	Cd
GEMS59	0.0156306	Cd
GEMS6	0.00672255	Cd
GEMS61	0.0045238	Cd
GEMS62	0.00514439	Cd
GEMS63	0.00423993	Cd
GEMS64	0.00504554	Cd
GEMS65	0.00471383	Cd
GEMS66	0.00617478	Cd
GEMS9	0.00525599	Cd
Gy1032	0.00464016	Cd
Gy220	0.00757285	Cd
Gy237	0.00970157	Cd
Gy386	0.00604842	Cd
GY386B	0.00620821	Cd
Gy462	0.00423468	Cd
H21	0.00674176	Cd
HB	0.0046015	Cd
HTH-17	0.00769109	Cd
Hua83-2	0.00610071	Cd
HuangC	0.00527175	Cd
Huangzaosi	0.0043191	Cd
HYS	0.00591232	Cd
IRF291	0.00661791	Cd
IRF314	0.00845046	Cd
J4112	0.0170001	Cd
JH59	0.0105837	Cd
JH96C	0.00486222	Cd
Ji412	0.0108401	Cd
Ji53	0.0142483	Cd
Ji63	0.0044449	Cd
Ji81162	0.0159615	Cd
Ji842	0.00651675	Cd
Ji846	0.00549726	Cd
Ji853	0.00552104	Cd
Jiao51	0.00566555	Cd
JY01	0.0207401	Cd
K10	0.00488253	Cd
K12	0.00716961	Cd
K22	0.0116576	Cd
L3180	0.00501715	Cd
LG001	0.0189229	Cd
Liao138	0.0240838	Cd
Liao159	0.00501571	Cd
Liao5114	0.017205	Cd
Liao5262	0.00460534	Cd
Liao5263	0.0235663	Cd
LK11	0.0137551	Cd
Lv28	0.00740207	Cd
Lx9801	0.00762	Cd
LXN	0.00658096	Cd
LY	0.00764961	Cd
LY042	0.0170127	Cd
M153	0.00493362	Cd
M165	0.00500124	Cd
M97	0.00400726	Cd
MN	0.00588941	Cd
MO113	0.00709725	Cd
Mo17	0.0124806	Cd
MO17	0.0111319	Cd
Nan21-3	0.00529097	Cd
NMJT	0.00649058	Cd
P138	0.0187645	Cd
P178	0.0164599	Cd
Q1261	0.00465379	Cd
Qi205	0.0232813	Cd
Qi318	0.0182426	Cd
Qi319	0.0232237	Cd
R08	0.00806584	Cd
R15	0.00480268	Cd
R15X1141	0.00492138	Cd
Ry684	0.0334209	Cd
Ry697	0.00544806	Cd
Ry729	0.00514999	Cd
S22	0.00523289	Cd
SC55	0.00661739	Cd
Shen137	0.0181304	Cd
Shen5003	0.00456629	Cd
Si273	0.0206949	Cd
Si444	0.00473571	Cd
Si446	0.00523078	Cd
SK	0.00888501	Cd
SW1611	0.0057654	Cd
SW92E114	0.0191505	Cd
Sy1032	0.00855033	Cd
Sy1035	0.0127103	Cd
Sy1039	0.00695081	Cd
Sy1052	0.00621305	Cd
Sy1077	0.00564873	Cd
Sy1128	0.00631261	Cd
Sy3073	0.0140874	Cd
Sy999	0.0116758	Cd
Tian77	0.00580183	Cd
Tie7922	0.014852	Cd
TT16	0.00613024	Cd
TX5	0.00471413	Cd
TY1	0.00749382	Cd
TY10	0.00786628	Cd
TY11	0.00800787	Cd
TY2	0.00754516	Cd
TY3	0.0126062	Cd
TY4	0.021236	Cd
TY5	0.00895435	Cd
TY6	0.00745157	Cd
TY7	0.00584196	Cd
TY8	0.00683867	Cd
TY9	0.00803702	Cd
U8112	0.0214408	Cd
W138	0.00626972	Cd
WH413	0.0044054	Cd
WMR	0.0211652	Cd
Wu109	0.00548498	Cd
X178	0.0184575	Cd
Xun971	0.0199122	Cd
XZ698	0.0145752	Cd
Yan414	0.00574114	Cd
Ye107	0.0198564	Cd
Ye478	0.0173939	Cd
Ye488	0.0141123	Cd
Ye515	0.00566584	Cd
Ye52106	0.00566216	Cd
Ye8001	0.0131014	Cd
Yu12	0.00963602	Cd
Yu374	0.00750341	Cd
Yu87-1	0.0191872	Cd
Z2018F	0.00468601	Cd
ZaC546	0.0225966	Cd
ZB648	0.00585295	Cd
Zheng22	0.00692483	Cd
Zheng28	0.0052084	Cd
Zheng29	0.0131224	Cd
Zheng30	0.0252973	Cd
Zheng32	0.0205376	Cd
Zheng35	0.00514743	Cd
Zheng58	0.0125224	Cd
Zheng653	0.00480999	Cd
Zhi41	0.00495311	Cd
Zhong69	0.0332528	Cd
Zi330	0.0059187	Cd
Zong31	0.00708784	Cd
ZZ01	0.00625306	Cd
ZZ03	0.0196532	Cd
