# Supplementary material for: Genome-Wide Association Study Reveals Genetic Basis of Trace Elements Accumulation in Maize Kernels
Source: MDPI journal article supplement (doi:10.3390/agriculture12020262), 2022-02-11
Supplement: s1 [file s1 › Supplemental table S3.xlsx]

## Sheet: Sheet1
Supplemental Table 3 SNPs assotiated with Cd accmulation in maize kernel, of which the p value were less than 10^-8.
Trait	Marker	Chr	Pos	df	F	p	errordf	MarkerR2	Genetic Var	Residual Var
Cd-BLUP	chr2.S_147034650	2	147034650	1	50.7344	5.7935e-12	365	0.13899	1.8652e-05	1.8652e-10
Cd-BLUP	chr2.S_147038672	2	147038672	1	42.4532	2.4354e-10	366	0.11612	1.8652e-05	1.8652e-10
Cd-BLUP	chr2.S_147038922	2	147038922	1	44.0216	1.1905e-10	366	0.12041	1.8652e-05	1.8652e-10
Cd-BLUP	chr2.S_147250315	2	147250315	1	39.8978	8.538e-10	339	0.12448	1.8652e-05	1.8652e-10
Cd-BLUP	chr2.S_148459588	2	148459588	1	34.9649	8.635e-09	324	0.10595	1.8652e-05	1.8652e-10
Cd-BLUP	chr2.S_148478913	2	148478913	1	41.5621	4.7779e-10	294	0.14544	1.8652e-05	1.8652e-10
Cd-BLUP	chr2.S_148500946	2	148500946	1	44.3972	1e-10	367	0.12139	1.8652e-05	1.8652e-10
Cd-BLUP	chr2.S_148508576	2	148508576	1	43.5973	1.4397e-10	367	0.1192	1.8652e-05	1.8652e-10
Cd-BLUP	chr2.S_148716449	2	148716449	1	38.71	1.3736e-09	363	0.11387	1.8652e-05	1.8652e-10
Cd-BLUP	chr2.S_149186864	2	149186864	1	36.1219	4.7751e-09	345	0.10394	1.8652e-05	1.8652e-10
Cd-BLUP	chr2.S_149337692	2	149337692	1	53.1069	2.3349e-12	336	0.17524	1.8652e-05	1.8652e-10
Cd-BLUP	chr2.S_149337693	2	149337693	1	57.4101	3.533e-13	338	0.1795	1.8652e-05	1.8652e-10
Cd-BLUP	chr2.S_149337694	2	149337694	1	42.7291	2.3275e-10	342	0.13364	1.8652e-05	1.8652e-10
Cd-BLUP	chr2.S_149337908	2	149337908	1	43.5703	1.507e-10	357	0.11956	1.8652e-05	1.8652e-10
Cd-BLUP	chr2.S_150622425	2	150622425	1	34.9224	7.9429e-09	366	0.0955	1.8652e-05	1.8652e-10
Cd-BLUP	chr2.S_150627343	2	150627343	1	39.1667	1.1185e-09	361	0.10844	1.8652e-05	1.8652e-10
Cd-BLUP	chr2.S_152232183	2	152232183	1	40.1035	8.4501e-10	315	0.12377	1.8652e-05	1.8652e-10
Cd-BLUP	chr2.S_152502789	2	152502789	1	37.8621	2.0498e-09	360	0.10515	1.8652e-05	1.8652e-10
Cd-BLUP	chr2.S_152505663	2	152505663	1	47.5994	2.4393e-11	357	0.13283	1.8652e-05	1.8652e-10
Cd-BLUP	chr2.S_152505844	2	152505844	1	36.6361	3.6117e-09	361	0.10062	1.8652e-05	1.8652e-10
Cd-BLUP	chr2.S_152505860	2	152505860	1	36.4767	3.9281e-09	357	0.10061	1.8652e-05	1.8652e-10
Cd-BLUP	chr2.S_153140437	2	153140437	1	43.7802	1.3377e-10	364	0.11982	1.8652e-05	1.8652e-10
Cd-BLUP	chr2.S_153140638	2	153140638	1	44.5035	9.6262e-11	364	0.1218	1.8652e-05	1.8652e-10
Cd-BLUP	chr2.S_153620679	2	153620679	1	38.5644	1.5186e-09	351	0.1106	1.8652e-05	1.8652e-10
Cd-BLUP	chr2.S_157608448	2	157608448	1	60.4982	8.6035e-14	350	0.18031	1.8652e-05	1.8652e-10
Cd-BLUP	chr2.S_158065078	2	158065078	1	34.5692	9.7145e-09	350	0.09569	1.8652e-05	1.8652e-10
Cd-BLUP	chr2.S_158065302	2	158065302	1	35.4433	6.3553e-09	357	0.09771	1.8652e-05	1.8652e-10
Cd-BLUP	chr2.S_158066501	2	158066501	1	36.1029	4.6854e-09	356	0.09966	1.8652e-05	1.8652e-10
Cd-BLUP	chr2.S_158388814	2	158388814	1	41.2294	4.3056e-10	363	0.11301	1.8652e-05	1.8652e-10	HMA4
Cd-BLUP	chr2.S_158407174	2	158407174	1	42.6967	2.7137e-10	307	0.13037	1.8652e-05	1.8652e-10	HMA3
Cd-BLUP	chr2.S_158407712	2	158407712	1	57.4019	3.1161e-13	360	0.15938	1.8652e-05	1.8652e-10	HMA3
Cd-BLUP	chr2.S_158408660	2	158408660	1	61.9519	4.1994e-14	364	0.1702	1.8652e-05	1.8652e-10	HMA3
Cd-BLUP	chr2.S_158410625	2	158410625	1	44.6276	9.0674e-11	365	0.12207	1.8652e-05	1.8652e-10	HMA3
Cd-BLUP	chr2.S_158451766	2	158451766	1	40.3393	6.5563e-10	359	0.11113	1.8652e-05	1.8652e-10
Cd-BLUP	chr2.S_158453784	2	158453784	1	51.1341	4.8259e-12	366	0.14009	1.8652e-05	1.8652e-10
Cd-BLUP	chr2.S_158453785	2	158453785	1	54.97	8.8377e-13	365	0.15063	1.8652e-05	1.8652e-10
Cd-BLUP	chr2.S_158453786	2	158453786	1	51.1335	4.8271e-12	366	0.14009	1.8652e-05	1.8652e-10
Cd-BLUP	chr2.S_158453787	2	158453787	1	51.1341	4.8259e-12	366	0.14009	1.8652e-05	1.8652e-10
Cd-BLUP	chr2.S_158514435	2	158514435	1	44.8568	9.5787e-11	324	0.14709	1.8652e-05	1.8652e-10
Cd-BLUP	chr2.S_158610078	2	158610078	1	44.7392	8.8658e-11	357	0.12329	1.8652e-05	1.8652e-10
Cd-BLUP	chr2.S_158610987	2	158610987	1	49.1544	1.3045e-11	341	0.13767	1.8652e-05	1.8652e-10
Cd-BLUP	chr2.S_158612104	2	158612104	1	45.977	5.046e-11	358	0.12695	1.8652e-05	1.8652e-10
Cd-BLUP	chr2.S_158613646	2	158613646	1	43.0085	1.9331e-10	359	0.11827	1.8652e-05	1.8652e-10
Cd-BLUP	chr2.S_158746650	2	158746650	1	35.4752	6.6167e-09	335	0.10015	1.8652e-05	1.8652e-10
Cd-BLUP	chr2.S_160781792	2	160781792	1	37.8385	2.0406e-09	366	0.10449	1.8652e-05	1.8652e-10
Cd-BLUP	chr2.S_160782026	2	160782026	1	37.8385	2.0406e-09	366	0.10449	1.8652e-05	1.8652e-10
Cd-BLUP	chr2.S_160782119	2	160782119	1	36.2851	4.2121e-09	365	0.10023	1.8652e-05	1.8652e-10
Cd-BLUP	chr2.S_160782130	2	160782130	1	36.2863	4.2097e-09	365	0.10024	1.8652e-05	1.8652e-10
Cd-BLUP	chr2.S_160782356	2	160782356	1	59.9919	1.0011e-13	361	0.16982	1.8652e-05	1.8652e-10
Cd-BLUP	chr2.S_160782358	2	160782358	1	57.8863	2.5071e-13	361	0.16586	1.8652e-05	1.8652e-10
Cd-BLUP	chr2.S_160782359	2	160782359	1	64.9115	1.2291e-14	357	0.18341	1.8652e-05	1.8652e-10
Cd-BLUP	chr2.S_160782397	2	160782397	1	49.7433	8.9865e-12	366	0.13736	1.8652e-05	1.8652e-10
Cd-BLUP	chr2.S_160782988	2	160782988	1	46.6474	3.6588e-11	363	0.12787	1.8652e-05	1.8652e-10
Cd-BLUP	chr2.S_160783228	2	160783228	1	35.703	6.0027e-09	332	0.1005	1.8652e-05	1.8652e-10
Cd-BLUP	chr2.S_160784046	2	160784046	1	39.203	1.1591e-09	343	0.11495	1.8652e-05	1.8652e-10
Cd-BLUP	chr2.S_160788931	2	160788931	1	45.1683	7.0689e-11	366	0.1234	1.8652e-05	1.8652e-10
Cd-BLUP	chr2.S_160788968	2	160788968	1	50.8863	5.3669e-12	367	0.13913	1.8652e-05	1.8652e-10
Cd-BLUP	chr2.S_160789124	2	160789124	1	47.2811	2.7075e-11	367	0.12927	1.8652e-05	1.8652e-10
Cd-BLUP	chr2.S_160797359	2	160797359	1	47.2811	2.7075e-11	367	0.12927	1.8652e-05	1.8652e-10
Cd-BLUP	chr2.S_160797386	2	160797386	1	47.2811	2.7075e-11	367	0.12927	1.8652e-05	1.8652e-10
Cd-BLUP	chr2.S_160797891	2	160797891	1	46	4.8314e-11	367	0.12577	1.8652e-05	1.8652e-10
Cd-BLUP	chr2.S_160798026	2	160798026	1	48.4768	1.5801e-11	367	0.13254	1.8652e-05	1.8652e-10
Cd-BLUP	chr2.S_160798113	2	160798113	1	51.7989	3.5722e-12	367	0.14162	1.8652e-05	1.8652e-10
Cd-BLUP	chr2.S_160798646	2	160798646	1	48.6943	1.4329e-11	367	0.13314	1.8652e-05	1.8652e-10
Cd-BLUP	chr2.S_160799648	2	160799648	1	45.8043	5.2981e-11	366	0.12648	1.8652e-05	1.8652e-10
Cd-BLUP	chr2.S_160800976	2	160800976	1	45.9998	4.8317e-11	367	0.12577	1.8652e-05	1.8652e-10
Cd-BLUP	chr2.S_160801591	2	160801591	1	46	4.8314e-11	367	0.12577	1.8652e-05	1.8652e-10
Cd-BLUP	chr2.S_160803019	2	160803019	1	40.3591	6.3665e-10	366	0.11049	1.8652e-05	1.8652e-10
Cd-BLUP	chr2.S_160803733	2	160803733	1	50.5323	6.2868e-12	367	0.13816	1.8652e-05	1.8652e-10
Cd-BLUP	chr2.S_160803958	2	160803958	1	39.7815	8.3774e-10	363	0.11532	1.8652e-05	1.8652e-10
Cd-BLUP	chr2.S_160804254	2	160804254	1	41.0367	4.6619e-10	366	0.11332	1.8652e-05	1.8652e-10
Cd-BLUP	chr2.S_160805125	2	160805125	1	42.3369	2.5765e-10	365	0.12141	1.8652e-05	1.8652e-10
Cd-BLUP	chr2.S_160805228	2	160805228	1	42.8577	2.0179e-10	367	0.11718	1.8652e-05	1.8652e-10
Cd-BLUP	chr2.S_160805238	2	160805238	1	44.4407	9.8712e-11	365	0.1219	1.8652e-05	1.8652e-10
Cd-BLUP	chr2.S_160805748	2	160805748	1	42.2152	2.7072e-10	367	0.11542	1.8652e-05	1.8652e-10
Cd-BLUP	chr2.S_160807799	2	160807799	1	44.0137	1.1947e-10	366	0.12049	1.8652e-05	1.8652e-10
Cd-BLUP	chr2.S_160957319	2	160957319	1	59.6376	1.1344e-13	366	0.16338	1.8652e-05	1.8652e-10
Cd-BLUP	chr2.S_160957564	2	160957564	1	49.2282	1.1414e-11	364	0.13508	1.8652e-05	1.8652e-10
Cd-BLUP	chr2.S_160962361	2	160962361	1	47.4376	2.5621e-11	363	0.13186	1.8652e-05	1.8652e-10
Cd-BLUP	chr2.S_161040617	2	161040617	1	51.5601	4.0267e-12	364	0.14294	1.8652e-05	1.8652e-10
Cd-BLUP	chr2.S_161045498	2	161045498	1	69.6333	1.5352e-15	366	0.19076	1.8652e-05	1.8652e-10
Cd-BLUP	chr2.S_161046272	2	161046272	1	53.2829	1.8641e-12	365	0.14603	1.8652e-05	1.8652e-10
Cd-BLUP	chr2.S_161048141	2	161048141	1	53.2829	1.8641e-12	365	0.14603	1.8652e-05	1.8652e-10
Cd-BLUP	chr2.S_161121346	2	161121346	1	62.4392	3.3585e-14	366	0.17242	1.8652e-05	1.8652e-10
Cd-BLUP	chr2.S_161121348	2	161121348	1	62.4395	3.3582e-14	366	0.17242	1.8652e-05	1.8652e-10
Cd-BLUP	chr2.S_161121349	2	161121349	1	62.4392	3.3585e-14	366	0.17242	1.8652e-05	1.8652e-10
Cd-BLUP	chr2.S_161121350	2	161121350	1	62.4392	3.3585e-14	366	0.17242	1.8652e-05	1.8652e-10
Cd-BLUP	chr2.S_161121354	2	161121354	1	62.4395	3.3582e-14	366	0.17242	1.8652e-05	1.8652e-10
Cd-BLUP	chr2.S_161121355	2	161121355	1	62.4392	3.3585e-14	366	0.17242	1.8652e-05	1.8652e-10
Cd-BLUP	chr2.S_161121357	2	161121357	1	62.4395	3.3582e-14	366	0.17242	1.8652e-05	1.8652e-10
Cd-BLUP	chr2.S_161122814	2	161122814	1	74.5924	1.8902e-16	366	0.20598	1.8652e-05	1.8652e-10
Cd-BLUP	chr2.S_161122976	2	161122976	1	74.5914	1.8911e-16	366	0.20598	1.8652e-05	1.8652e-10
Cd-BLUP	chr2.S_161123833	2	161123833	1	74.5924	1.8902e-16	366	0.20598	1.8652e-05	1.8652e-10
Cd-BLUP	chr2.S_161124097	2	161124097	1	49.4862	1.0168e-11	364	0.13675	1.8652e-05	1.8652e-10
Cd-BLUP	chr2.S_161126464	2	161126464	1	54.9805	9.0225e-13	360	0.15089	1.8652e-05	1.8652e-10
Cd-BLUP	chr2.S_161197660	2	161197660	1	47.3325	2.8531e-11	348	0.13299	1.8652e-05	1.8652e-10
Cd-BLUP	chr2.S_161197761	2	161197761	1	49.8139	9.2499e-12	352	0.14115	1.8652e-05	1.8652e-10
Cd-BLUP	chr2.S_161197797	2	161197797	1	46.7284	3.7261e-11	349	0.13451	1.8652e-05	1.8652e-10
Cd-BLUP	chr2.S_161197800	2	161197800	1	46.9495	3.3739e-11	349	0.13221	1.8652e-05	1.8652e-10
Cd-BLUP	chr2.S_161197824	2	161197824	1	48.2001	1.9101e-11	351	0.13859	1.8652e-05	1.8652e-10
Cd-BLUP	chr2.S_161197890	2	161197890	1	51.8865	3.6654e-12	353	0.14685	1.8652e-05	1.8652e-10
Cd-BLUP	chr2.S_161273716	2	161273716	1	65.4735	9.9438e-15	353	0.18236	1.8652e-05	1.8652e-10
Cd-BLUP	chr2.S_161273717	2	161273717	1	64.7529	1.3628e-14	352	0.17849	1.8652e-05	1.8652e-10
Cd-BLUP	chr2.S_161273718	2	161273718	1	64.5271	1.5117e-14	351	0.17838	1.8652e-05	1.8652e-10
Cd-BLUP	chr2.S_161273720	2	161273720	1	64.6538	1.4018e-14	354	0.17786	1.8652e-05	1.8652e-10
Cd-BLUP	chr2.S_161275547	2	161275547	1	84.2117	3.4571e-18	367	0.23024	1.8652e-05	1.8652e-10
Cd-BLUP	chr2.S_163569385	2	163569385	1	36.7209	3.6082e-09	346	0.10297	1.8652e-05	1.8652e-10
Cd-BLUP	chr2.S_164889771	2	164889771	1	35.844	5.2104e-09	362	0.0984	1.8652e-05	1.8652e-10
Cd-BLUP	chr2.S_167363664	2	167363664	1	35.7762	5.3905e-09	361	0.09887	1.8652e-05	1.8652e-10
Cd-BLUP	chr2.S_167363666	2	167363666	1	35.8355	5.2311e-09	362	0.099	1.8652e-05	1.8652e-10
Cd-BLUP	chr2.S_168555235	2	168555235	1	40.8824	5.034e-10	364	0.11948	1.8652e-05	1.8652e-10
Cd-BLUP	chr2.S_171743763	2	171743763	1	50.5731	6.2531e-12	364	0.13972	1.8652e-05	1.8652e-10
Cd-BLUP	chr2.S_171746301	2	171746301	1	44.6089	9.1133e-11	366	0.122	1.8652e-05	1.8652e-10
Cd-BLUP	chr2.S_171819785	2	171819785	1	43.59	1.6373e-10	332	0.1219	1.8652e-05	1.8652e-10
Cd-BLUP	chr2.S_171819839	2	171819839	1	43.805	1.504e-10	329	0.12265	1.8652e-05	1.8652e-10
Cd-BLUP	chr2.S_173606216	2	173606216	1	39.0626	1.2003e-09	353	0.11407	1.8652e-05	1.8652e-10
Cd-BLUP	chr2.S_173607344	2	173607344	1	36.1411	4.5365e-09	362	0.09993	1.8652e-05	1.8652e-10
Cd-BLUP	chr2.S_173607661	2	173607661	1	35.5865	5.8893e-09	361	0.09833	1.8652e-05	1.8652e-10
Cd-BLUP	chr2.S_173607662	2	173607662	1	35.5865	5.8893e-09	361	0.09833	1.8652e-05	1.8652e-10
Cd-BLUP	chr2.S_173610846	2	173610846	1	36.029	4.7687e-09	363	0.09958	1.8652e-05	1.8652e-10
Cd-BLUP	chr2.S_174097398	2	174097398	1	44.7129	8.908e-11	359	0.13022	1.8652e-05	1.8652e-10
Cd-BLUP	chr2.S_174097410	2	174097410	1	46.8474	3.4211e-11	357	0.13659	1.8652e-05	1.8652e-10
Cd-BLUP	chr2.S_174097422	2	174097422	1	36.3217	4.2639e-09	353	0.10321	1.8652e-05	1.8652e-10
Cd-BLUP	chr2.S_174097539	2	174097539	1	36.5341	4.7934e-09	284	0.12202	1.8652e-05	1.8652e-10
Cd-BLUP	chr2.S_174100235	2	174100235	1	40.8581	5.3467e-10	348	0.11739	1.8652e-05	1.8652e-10
Cd-BLUP	chr2.S_174100279	2	174100279	1	35.4222	6.5589e-09	348	0.10735	1.8652e-05	1.8652e-10
Cd-BLUP	chr2.S_174103200	2	174103200	1	42.0526	2.9345e-10	365	0.1151	1.8652e-05	1.8652e-10
Cd-BLUP	chr2.S_174105517	2	174105517	1	45.3344	6.6023e-11	364	0.1241	1.8652e-05	1.8652e-10
Cd-BLUP	chr2.S_174335847	2	174335847	1	35.6302	5.7306e-09	364	0.0981	1.8652e-05	1.8652e-10
Cd-BLUP	chr2.S_174677786	2	174677786	1	36.802	3.303e-09	366	0.10069	1.8652e-05	1.8652e-10
Cd-BLUP	chr2.S_174678068	2	174678068	1	36.8006	3.3052e-09	366	0.10068	1.8652e-05	1.8652e-10
Cd-BLUP	chr2.S_174678420	2	174678420	1	36.8006	3.3052e-09	366	0.10068	1.8652e-05	1.8652e-10
Cd-BLUP	chr2.S_174679621	2	174679621	1	35.4623	7.4559e-09	297	0.11918	1.8652e-05	1.8652e-10
Cd-BLUP	chr2.S_174679821	2	174679821	1	36.802	3.303e-09	366	0.10069	1.8652e-05	1.8652e-10
Cd-BLUP	chr2.S_174682789	2	174682789	1	36.9221	3.2872e-09	346	0.10554	1.8652e-05	1.8652e-10
Cd-BLUP	chr2.S_174682948	2	174682948	1	38.1439	1.7711e-09	366	0.10436	1.8652e-05	1.8652e-10
